# Supplementary material for: Seamless mapping of long-term (2010–2020) daily global XCO 2 and XCH 4 from GOSAT, OCO-2, and CAMS-EGG4 with a spatiotemporally self-supervised fusion method
Source: Copernicus journal article supplement (doi:10.5194/essd-2023-28), 2023-03-02
Supplement: Supplementary file [file essd-2023-28-AC1-supplement.pdf]

## **Response to Comments on the Manuscript (essd-2023-28):**

### **Seamless mapping of long-term (2010-2020) daily global XCO<sub>2</sub> and XCH<sub>4</sub> from GOSAT, OCO-2, and CAMS-EGG4 with a spatiotemporally self-supervised fusion method**

---

Dear Editors and Referees,

We would like to sincerely express our gratitude to you for your careful reading and constructive comments.

According to the comments, we have tried our best to improve the manuscript, and an item-by-item response follows. The modified parts have been highlighted in yellow color in the revised manuscript.

Once again, we are particularly grateful for your careful reading and constructive comments. Thanks very much for your time.

Best regards,

Qiangqiang Yuan

## Response to Comments of Referee #1:

### General comments:

The manuscript designed a self-supervised fusion method based on spatiotemporal Discrete Cosine Transform to fuse sparse satellite data and global full-coverage GHGs reanalysis data for the seamless estimation of long-term daily global XCO<sub>2</sub> and XCH<sub>4</sub>. It is an interesting study, especially for providing long-term XCO<sub>2</sub> and XCH<sub>4</sub> datasets that don't need any auxiliary variables and analyzing the global pattern of XCO<sub>2</sub> and XCH<sub>4</sub> trends. I think the paper needs minor revision before acceptance for publication.

**Response:** We would like to take this opportunity to gratefully thank the referee for his/her comments and recommendations for improving the paper. An item-by-item response to the constructive comments follows. Thanks for your time.

### Specific comments:

**Q1.1:** The assessments of spatial distribution on a daily temporal scale may be necessary for a daily dataset.

**Response:** Thank the referee for his/her valuable comment. The assessments of spatial distribution on a daily temporal scale have been appended in the manuscript.

### The main revision is as follows:

Figure 12 illustrates the examples of daily fused XCO<sub>2</sub> and XCH<sub>4</sub> over the globe, consisting of three days in three years. As shown, the fused results display detailed information on atmospheric CO<sub>2</sub> and CH<sub>4</sub>, which clearly indicate their regional and global spatial patterns. In addition, incoherent or factitious spatial distribution is not observed in the fused XCO<sub>2</sub> and XCH<sub>4</sub>. Next, Fig. 13 provides the corresponding daily XCO<sub>2</sub> and XCH<sub>4</sub> from GOSAT and OCO-2 over the globe. It is worth noting that the daily satellite XCO<sub>2</sub> and XCH<sub>4</sub> are mapped via footprints due to their significant sparse coverage, which are nearly invisible at grids of 0.25°. As expected, the fused results present identical spatial distribution compared to XCO<sub>2</sub> and XCH<sub>4</sub> from GOSAT and OCO-2. This suggests the robustness and reliability of the proposed fusion method.

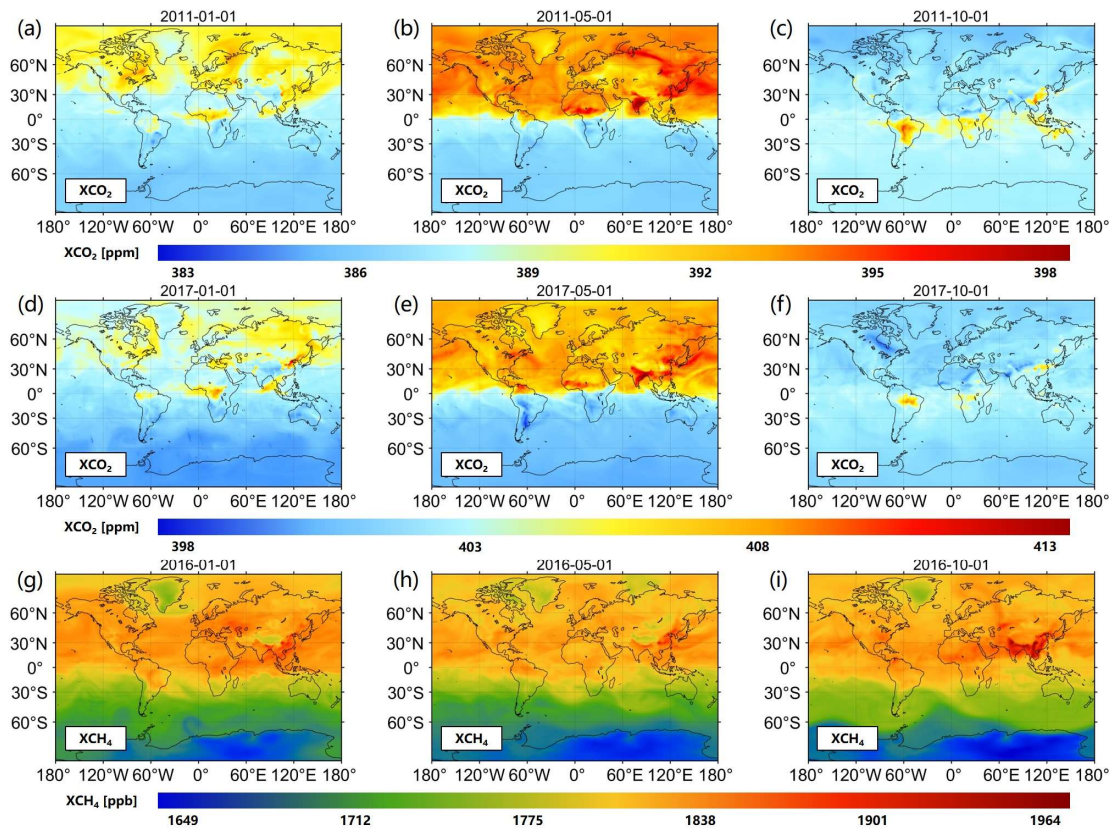

Figure 12. Daily fused (a-f) XCO<sub>2</sub> and (g-i) XCH<sub>4</sub> over the globe. Color ramps stand for the values of XCO<sub>2</sub> and XCH<sub>4</sub>.

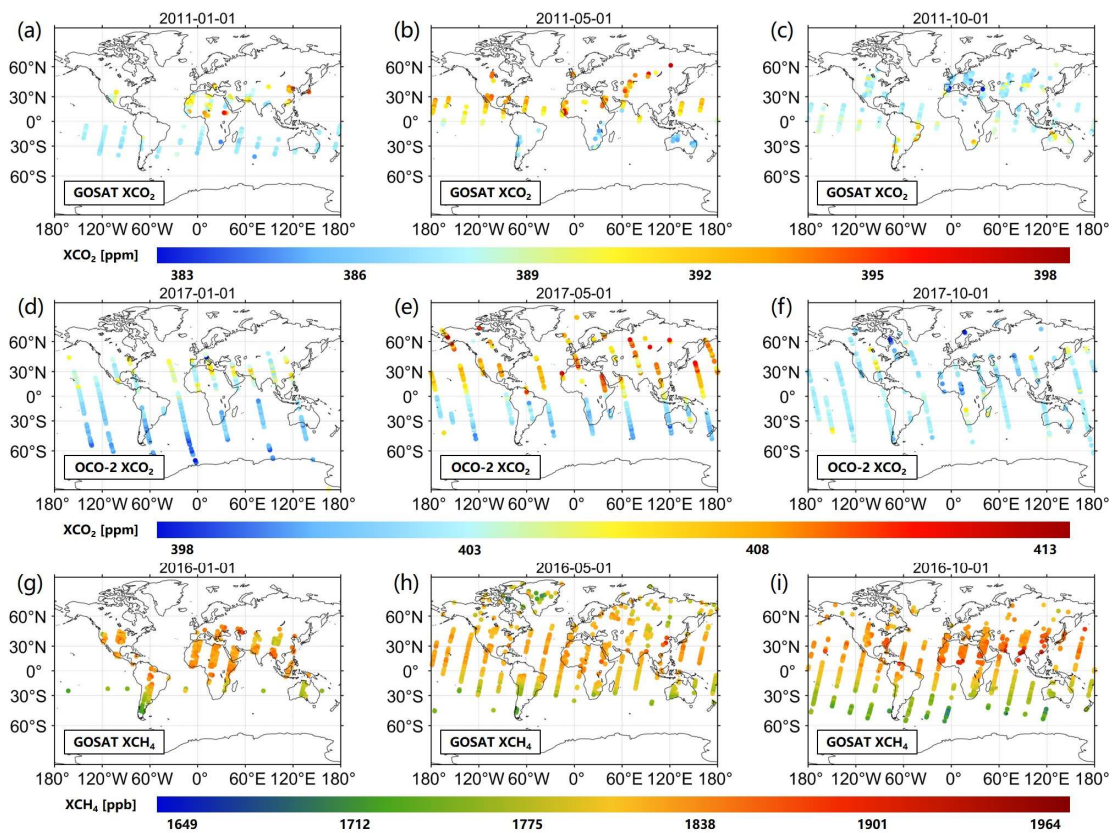

Figure 13. Daily (a-c) GOSAT, (d-f) OCO-2 XCO<sub>2</sub>, and (g-i) GOSAT XCH<sub>4</sub> over the globe. Color ramps stand for the values of XCO<sub>2</sub> and XCH<sub>4</sub>.

**Q1.2:** Satellite XCO<sub>2</sub> of 2010-2014 and 2015-2020 come from two datasets. It is crucial for users who rely on the long-term dataset to assess the sensitivity difference between various data. Did the authors compare the difference between the two datasets, and was this difference either ignored or corrected for?

**Response:** Thank the referee for his/her important comment. Concerning the CAMS-EGG4 product, a total of 7 satellite XCO<sub>2</sub> datasets are considered in the assimilation during different overlapped periods (Agusti-Panareda et al., 2022), such as CO<sub>2</sub>\_IAS\_NLIS (IASI), CO<sub>2</sub>\_GOS\_SRFP (GOSAT), and CO<sub>2</sub>\_GOS\_BESD (GOSAT). In our study, the XCO<sub>2</sub> from GOSAT and OCO-2 are adopted for the fusion from 2010 to 2020. Table r1 lists the specific information of XCO<sub>2</sub> from GOSAT and OCO-2. To compare their fusion performance, Figure r1 depicts the in-situ validation results of the fused results with GOSAT and OCO-2 XCO<sub>2</sub> during 2015-2019. As can be seen, the fusion with GOSAT XCO<sub>2</sub> will lead to a negative bias of -0.415 ppm and higher RMSE/ $\sigma$  compared to OCO-2. This suggests the usage of OCO-2 XCO<sub>2</sub> for the fusion after 2015 is more appropriate, which is likely attributed to its better accuracy and larger coverage. Hence, the proposed fusion method utilizes the XCO<sub>2</sub> from GOSAT and OCO-2 during 2010-2014 and 2015-2020, respectively. Eventually, the fused results present similar performance during two periods (see Figure r2), indicating the consistency of our long-term XCO<sub>2</sub> dataset.

**Table r1.** Specific information of XCO<sub>2</sub> from GOSAT and OCO-2.

| Source | Scientific data record | Spatial resolution        | Temporal resolution        | Available period |
|--------|------------------------|---------------------------|----------------------------|------------------|
| GOSAT  | “XCO <sub>2</sub> ”    | 10.5 km (diameter)        | Daily (~ 13:00 local time) | 2010-2019        |
| OCO-2  | “XCO <sub>2</sub> ”    | 1.29×2.25 km <sup>2</sup> | Daily (~ 13:36 local time) | 2015-2020        |

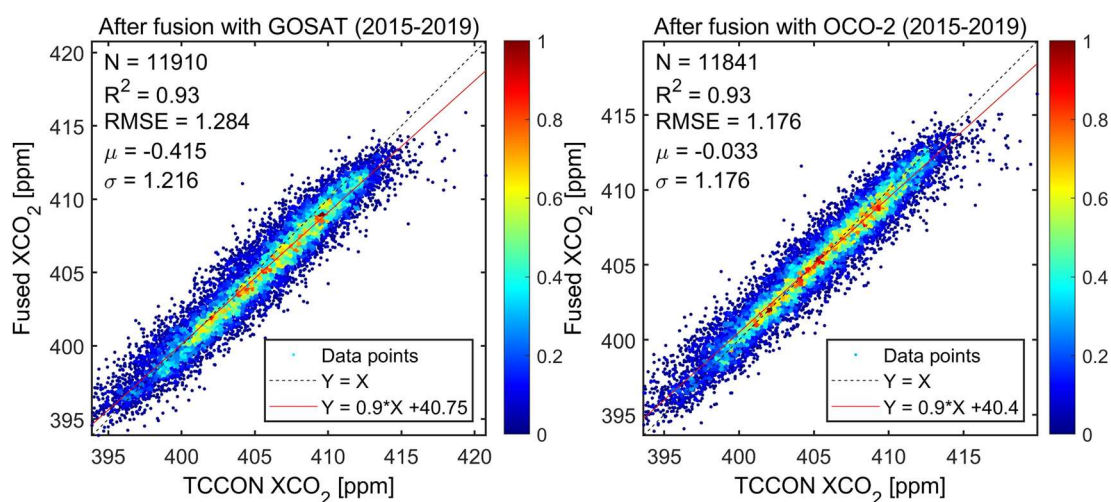

**Figure r1.** Density scatter-plots of the in-situ validation results for fused XCO<sub>2</sub> with (left) GOSAT and (right) OCO-2 from 2015 to 2019. Black dotted and red full lines stand for the 1:1 and fitted lines, respectively. Color ramps show the normalized densities of data points. X: TCCON data; Y: fused data. Unit: ppm for RMSE,  $\mu$ , and  $\sigma$ .

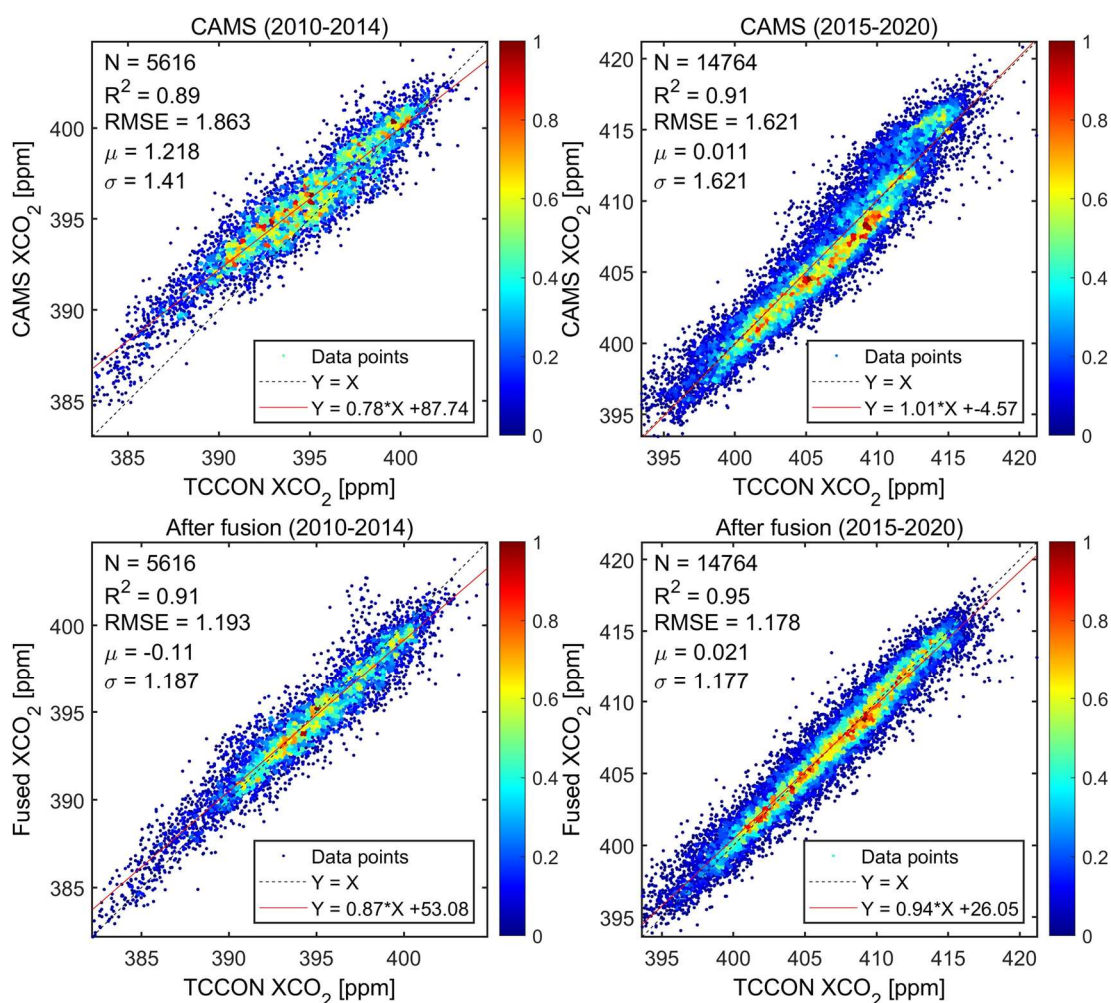

**Figure r2.** Density scatter-plots of the in-situ validation results for (upper) CAMS-EGG4 and (lower) fused XCO<sub>2</sub>. Black dotted and red full lines stand for the 1:1 and fitted lines, respectively. Color ramps show the normalized densities of data points. X: TCCON data; Y: CAMS-EGG4/fused data. Unit: ppm for RMSE,  $\mu$ , and  $\sigma$ .

### Reference:

Agusti-Panareda, A., Barré, J., Massart, S., Inness, A., Aben, I., Ades, M., Baier, B. C., Balsamo, G., Borsdorff, T., Bousserez, N., Boussetta, S., Buchwitz, M., Cantarello, L., Crevoisier, C., Engelen, R., Eskes, H., Flemming, J., Garrigues, S., Hasekamp, O., Huijnen, V., Jones, L., Kipling, Z., Langerock, B., McNorton, J., Meilhac, N., Noel, S., Parrington, M., Peuch, V.-H., Ramonet, M., Ratzinger, M., Reuter, M., Ribas, R., Suttie, M., Sweeney, C., Tarniewicz, J., and Wu, L.: Technical note: The CAMS greenhouse gas reanalysis from 2003 to 2020, EGU sphere, 1–51, <https://doi.org/10.5194/egusphere-2022-283>, 2022.

**Q1.3:** I have some questions that are not addressed in the Methodology section. What are the range and meaning of M, N, and P in line 175? while u, v and w have the same range as i, j and

#### t. what's the difference and relationship between them?

**Response:** Thank the referee for his/her careful comment. In our study,  $M$ ,  $N$ , and  $P$  represent the counts of rows (latitude), columns (longitude), and temporal sequences (days), which equal 721 ( $0.25^\circ$ , global grids), 1441 ( $0.25^\circ$ , global grids), and days of a year (365 or 366), respectively. Besides,  $i$ ,  $j$ , and  $t$  stand for the row, column, and temporal sequence, respectively. By contrast,  $u$ ,  $v$ , and  $w$  denote the transformed coordinates in frequency domain. Although  $u$ ,  $v$ , and  $w$  share the same ranges with  $i$ ,  $j$ , and  $t$ , their meanings are different. An example is provided in Figure r3 to show the difference and relationship between them. More related descriptions have been appended in the manuscript.

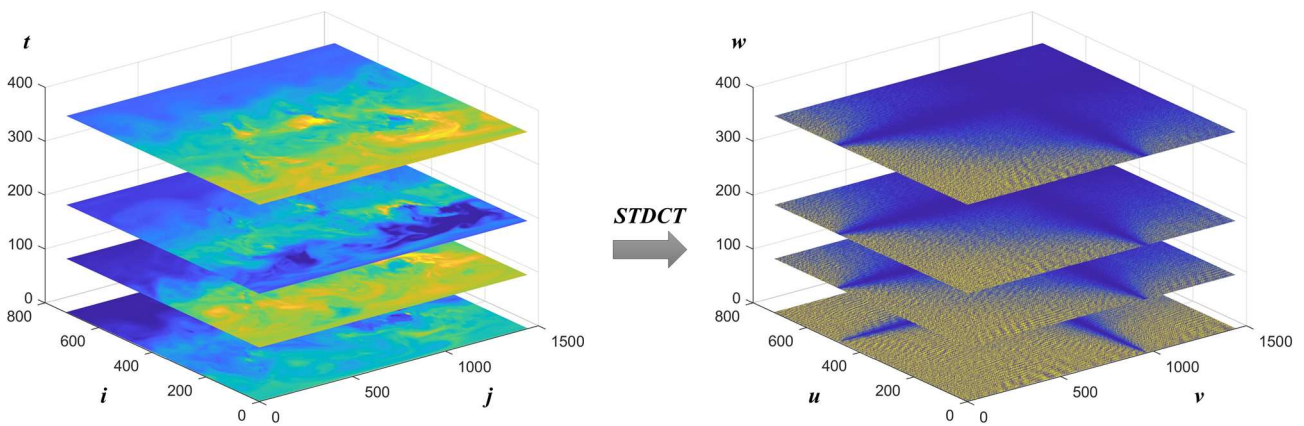

**Figure r3.** Comparison between CAMS-EGG4 XCO<sub>2</sub> and its transformed three-dimensional tensor after *STDCT* in 2015.

#### The main revision is as follows:

$M$ ,  $N$ , and  $P$  stand for the counts of rows (latitude), columns (longitude), and temporal sequences (days), which equal 721 ( $0.25^\circ$ , global grids), 1441 ( $0.25^\circ$ , global grids), and days of a year (365 or 366), respectively.

**Q1.4:** In the Equation 4,  $\delta$  represents a series of values or a three-dimensional tensor. Based on Equations 5 and 6, it appears that  $\delta$  is a tensor. How are positions without values in  $\delta$  handled and does it affect the final iteration process?

**Response:** Thank the referee for his/her comment.  $\delta$  is defined as a three-dimensional tensor, of which the values are only available when satellite XCO<sub>2</sub>/XCH<sub>4</sub> products are valid. In our study, the proposed fusion method can reconstruct the missing information in  $\delta$  using its available values. Specific procedures are as follows:

(1) Initialize missing values in  $\delta$  through the spatiotemporal nearest neighbor interpolation.

(2) Update  $\delta$  by iterations with Eq. (6) based on the spatiotemporal knowledge of self-correlation. Retain the original available values of  $\delta$  after each iteration.

(3) Repeat procedure (2) until the number of total iterations or error reaches a predetermined threshold. A schematic diagram to demonstrate the iteration process of  $\delta$  (fusion with OCO-2 XCO<sub>2</sub>) in 2017-04-10 is depicted in Figure r4.

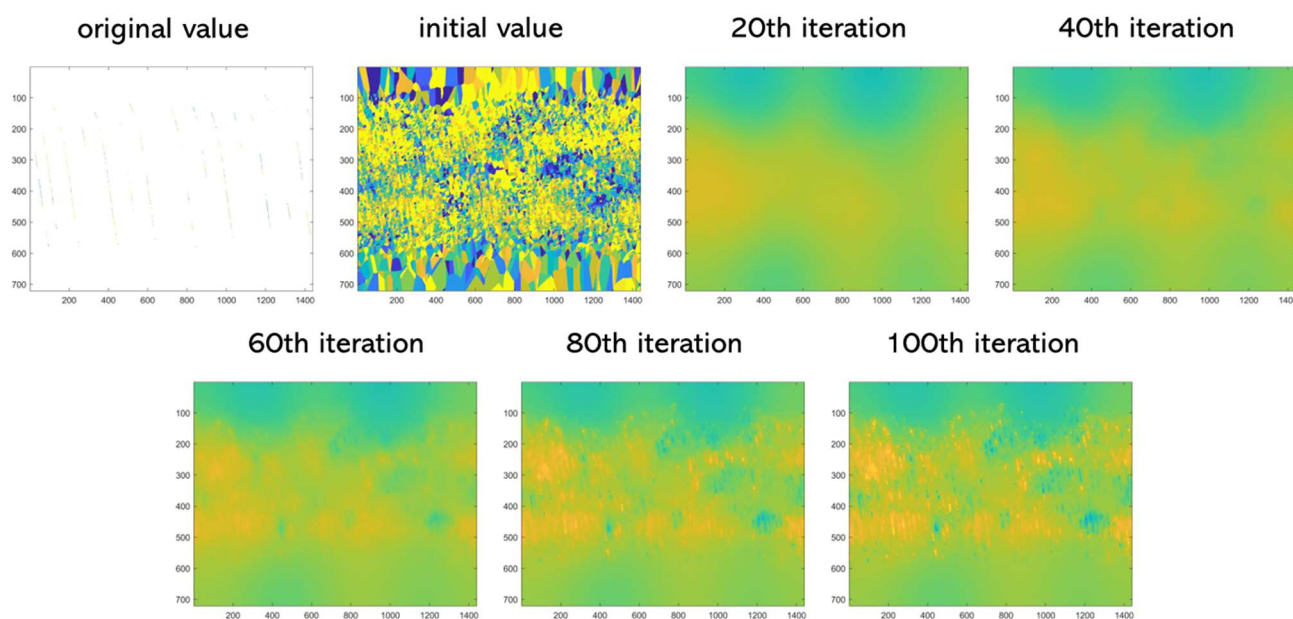

**Figure r4.** Schematic diagram to show the iteration process of  $\delta$  (fusion with OCO-2 XCO<sub>2</sub>) in 2017-04-10.

**Q1.5:** I am curious that the configuration of the parameters in line 208. How do these parameters affect the results, especially for  $\epsilon$ ?

**Response:** Thank the referee for his/her comment. The number of total iterations affects the performance of fused results. The fusion performance firstly increases as the number of total iterations rises and then tends to be relatively stable.  $\gamma$  is a relaxation factor to accelerate convergence. The convergence will be faster as  $\gamma$  grows up. However, a large  $\gamma$  may magnify the error of convergence.  $\epsilon$  represents a smoothing factor. A large  $\gamma$  value could result in the loss of high-frequency components (Garcia, 2010). This parameter generally needs to be smaller and smaller to reduce the influence of smoothing during the iterations.

**Reference:**

Garcia, D.: Robust smoothing of gridded data in one and higher dimensions with missing values, Computational Statistics & Data Analysis, 54, 1167–1178, <https://doi.org/10.1016/j.csda.2009.09.020>, 2010.

### Technical corrections:

**Q1.6: L21: The full name of  $\sigma$  and  $R^2$ .**

**Response:** Thank the referee for his/her comment. The full name of  $\sigma$  and  $R^2$  have been appended in Line 21.

#### The main revision is as follows:

Validation results show that the proposed method achieves a satisfactory accuracy, with the Standard-Deviation of Bias ( $\sigma$ ) of  $\sim 1.18$  ppm for  $XCO_2$  and 11.3 ppb for  $XCH_4$  against TCCON measurements from 2010 to 2020. Meanwhile, the Determination-Coefficient ( $R^2$ ) of  $XCO_2$  and  $XCH_4$  reach 0.91/0.95 (2010-2014/2015-2020) and 0.9 (2010-2020) after fusion, respectively.

**Q1.7: L21-22: Why the  $R^2$  of  $XCO_2$  against TCCON measurements is given as a range, while the  $R^2$  of  $XCH_4$  is a single number? They should be consistent.**

**Response:** Thank the referee for his/her comment. The  $R^2$  of  $XCO_2$  against TCCON measurements has been revised in the manuscript.

#### The main revision is as follows:

Validation results show that the proposed method achieves a satisfactory accuracy, with the Standard-Deviation of Bias ( $\sigma$ ) of  $\sim 1.18$  ppm for  $XCO_2$  and 11.3 ppb for  $XCH_4$  against TCCON measurements from 2010 to 2020. Meanwhile, the Determination-Coefficient ( $R^2$ ) of  $XCO_2$  and  $XCH_4$  reach 0.91/0.95 (2010-2014/2015-2020) and 0.9 (2010-2020) after fusion, respectively.

**Q1.8: L117: The full name of QA. It is the first mention in this text.**

**Response:** Thank the referee for his/her comment. The full name of QA was given in Line 127 by mistake and has been moved to Line 117.

#### The main revision is as follows:

Furthermore, the quality assurance (QA) records of “ $XCO_2$  Quality Flag” and “ $XCH_4$  Quality Flag” are exploited to filter



bad data.

**Q1.9: L349:  $R^2$ : 0.91 or 0.95 means the results of GOSAT and OCO-2? This sentence can be expressed more clearly.**

**Response:** Thank the referee for his/her comment. This sentence has been reworded to be more clearly.

**The main revision is as follows:**

Validation results show that the S-STDCT fusion method performs well over the globe, with the  $\sigma$  of  $\sim 1.18$  ppm for  $XCO_2$  and 11.3 ppb for  $XCH_4$  against TCCON measurements during 2010-2020. Meanwhile, the  $R^2$  of fused  $XCO_2$  and  $XCH_4$  reach 0.91/0.95 (2010-2014/2015-2020) and 0.9 (2010-2020), respectively.

**Q1.10: Figures: Modify the superscript of  $R^2$  and subscript of  $XCO_2$  and  $XCH_4$  in all Figures.**

**Response:** Thank the referee for his/her careful comment. The superscript of  $R^2$  and subscript of  $XCO_2$  and  $XCH_4$  have been modified in all figures.

**The main revision is as follows:**

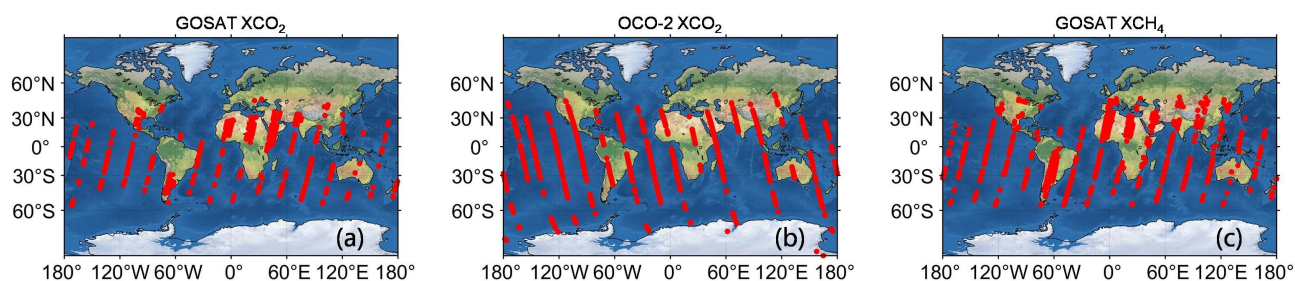

**Figure 1.** An example of daily spatial footprints for (a) GOSAT  $XCO_2$ , (b) OCO-2  $XCO_2$ , and (c) GOSAT  $XCH_4$ . Red points signify the available data. Background maps are naturally shaded reliefs over the globe.

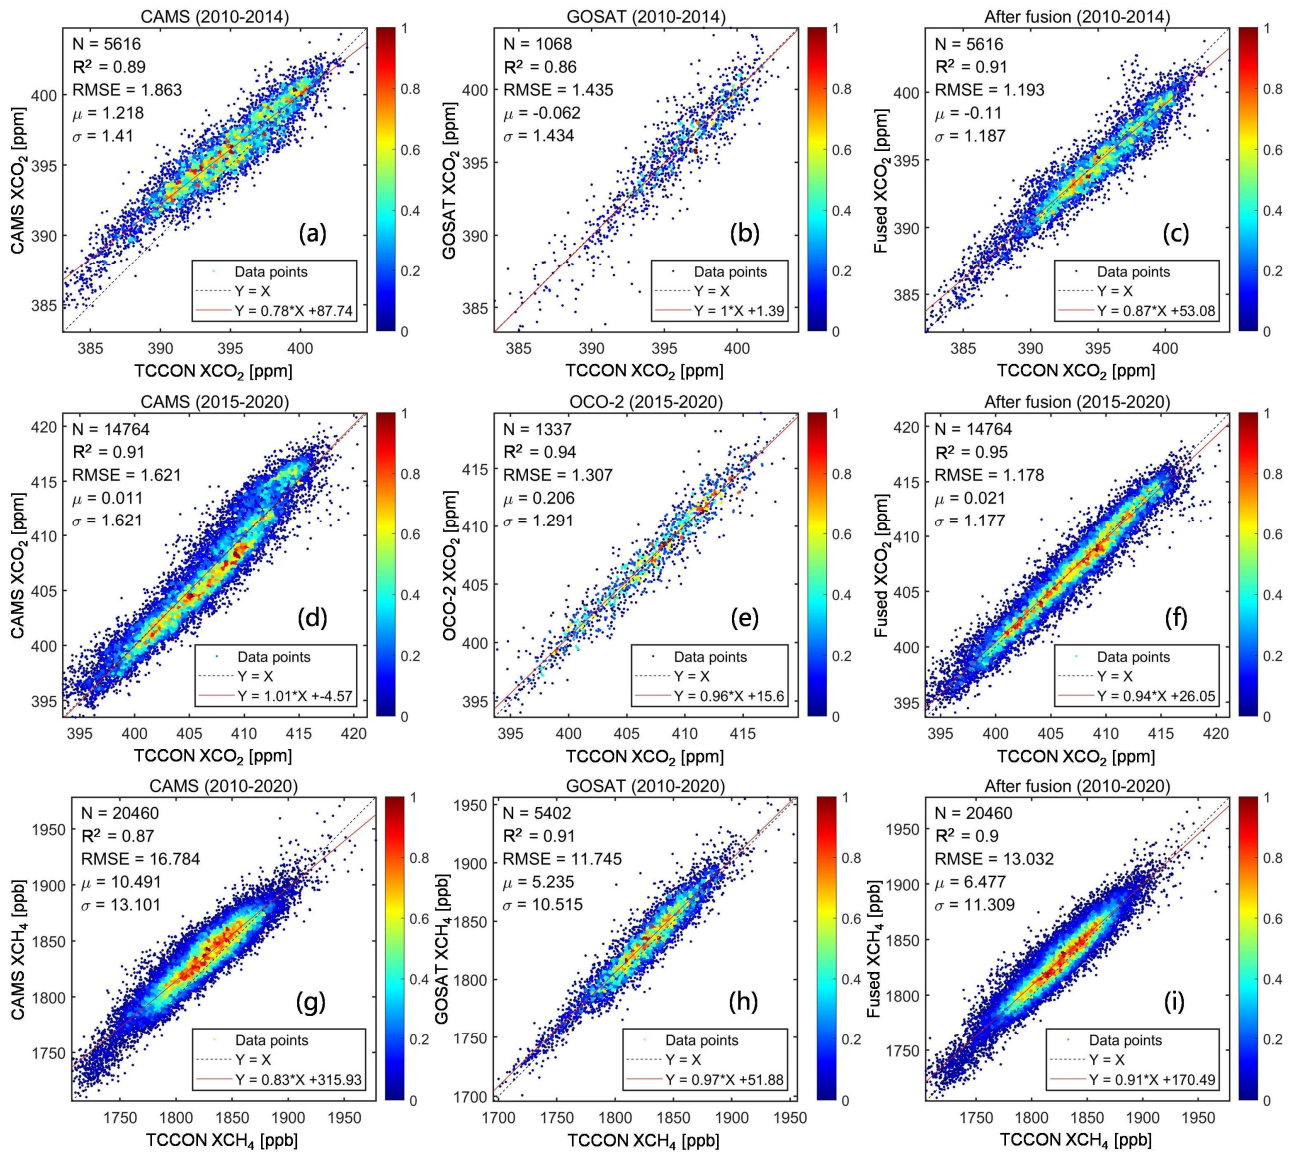

**Figure 3.** Density scatter-plots of the in-situ validation results for (a, d, and g) CAMS-EGG4, (b and h) GOSAT, (e) OCO-2, and (c, f, and i) fused results. Black dotted and red full lines stand for the 1:1 and fitted lines, respectively. Color ramps show the normalized densities of data points. X: TCCON data; Y: CAMS-EGG4/GOSAT/OCO-2/fused data. Unit: ppm/ppb to XCO<sub>2</sub>/XCH<sub>4</sub> for RMSE,  $\mu$ , and  $\sigma$ .

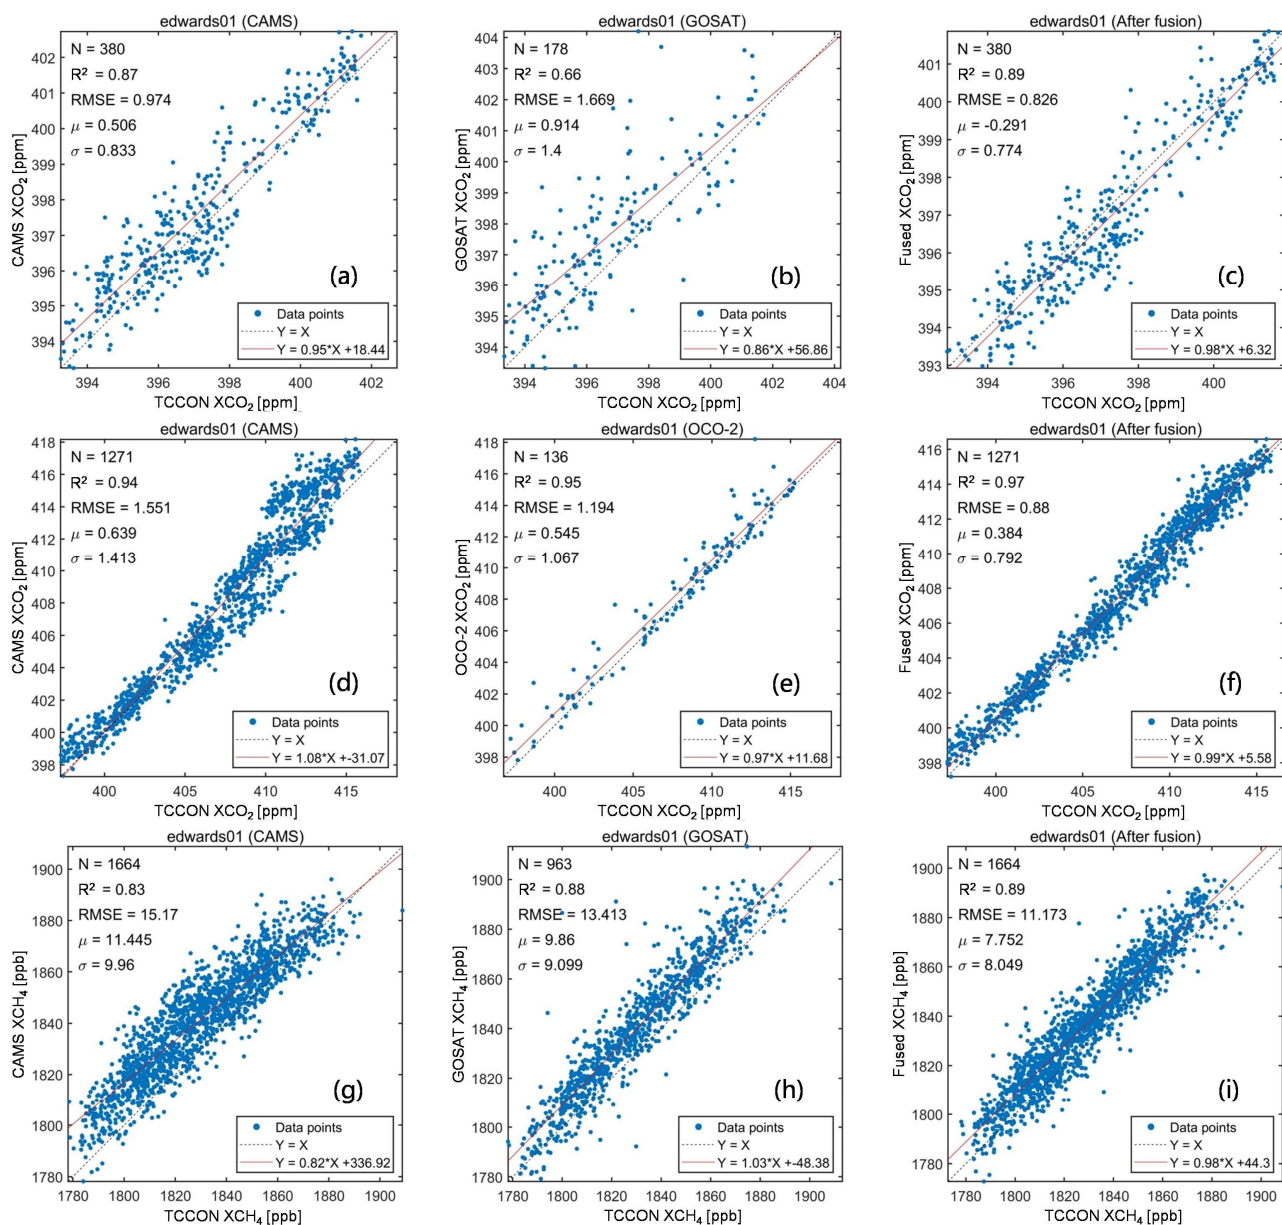

**Figure 4.** Scatter-plots of the in-situ validation results for (a, d, and g) CAMS-EGG4, (b and h) GOSAT, (e) OCO-2, and (c, f, and i) fused results on edwards01. Black dotted and red full lines stand for the 1:1 and fitted lines, respectively. X: TCCON data; Y: CAMS-EGG4/GOSAT/OCO-2/fused data. Unit: ppm/ppb to XCO<sub>2</sub>/XCH<sub>4</sub> for RMSE,  $\mu$ , and  $\sigma$ .

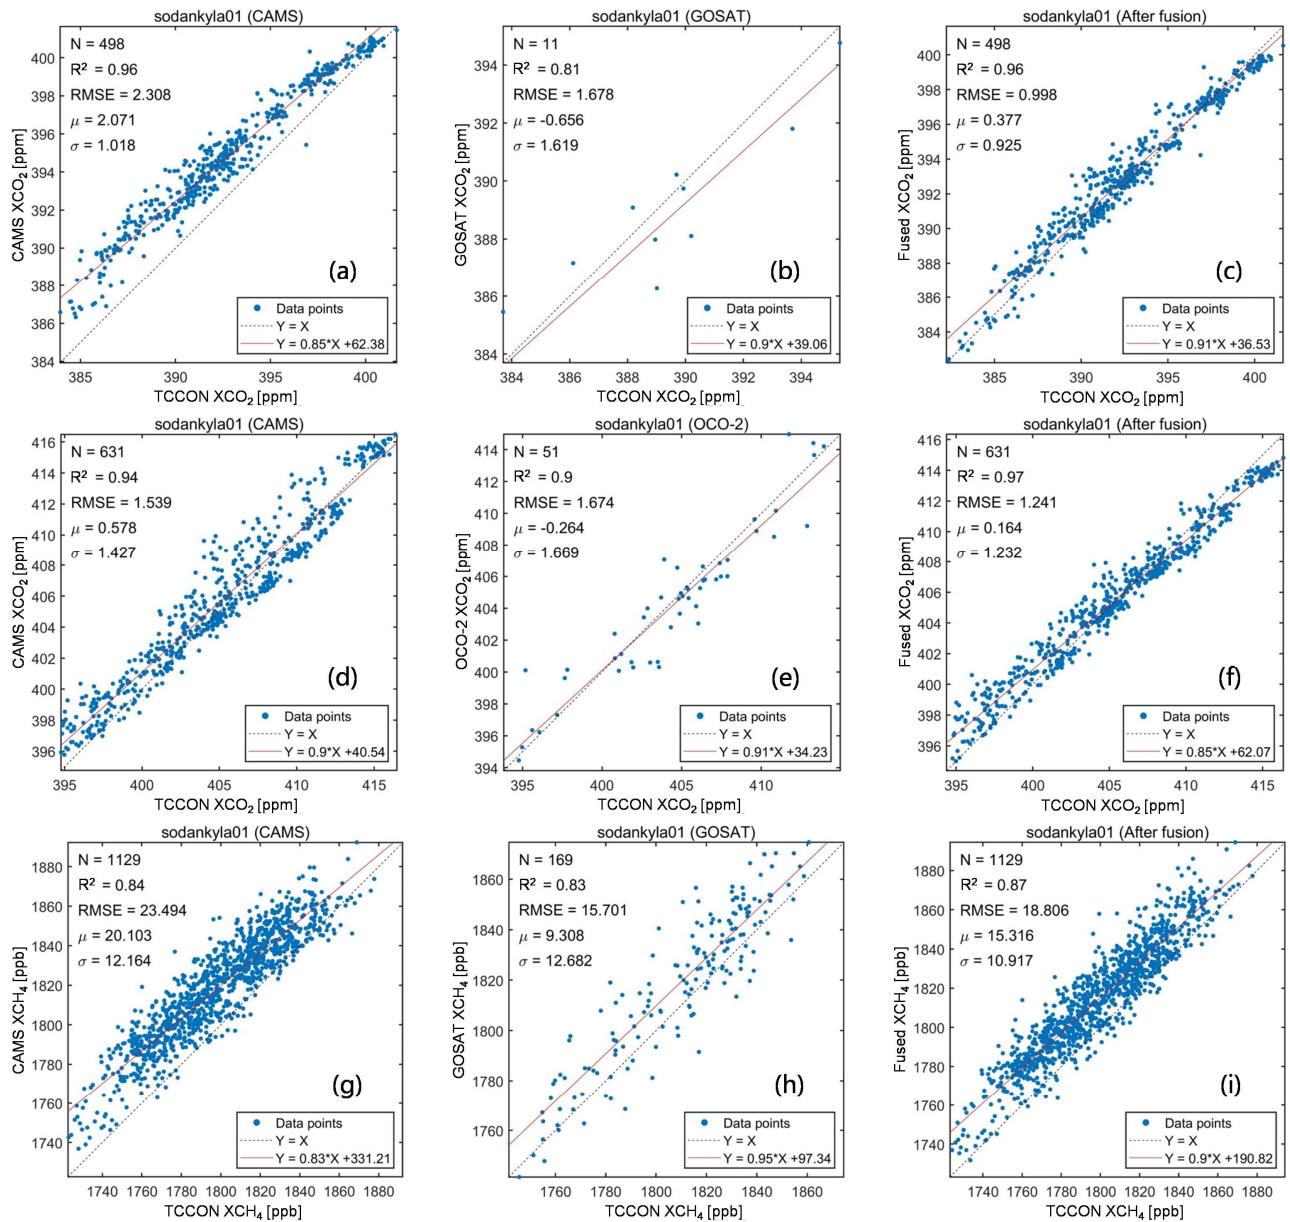

**Figure 5.** Scatter-plots of the in-situ validation results for (a, d, and g) CAMS-EGG4, (b and h) GOSAT, (e) OCO-2, and (c, f, and i) fused results on sodankyla01. Black dotted and red full lines stand for the 1:1 and fitted lines, respectively. X: TCCON data; Y: CAMS-EGG4/GOSAT/OCO-2/fused data. Unit: ppm/ppb to XCO<sub>2</sub>/XCH<sub>4</sub> for RMSE,  $\mu$ , and  $\sigma$ .

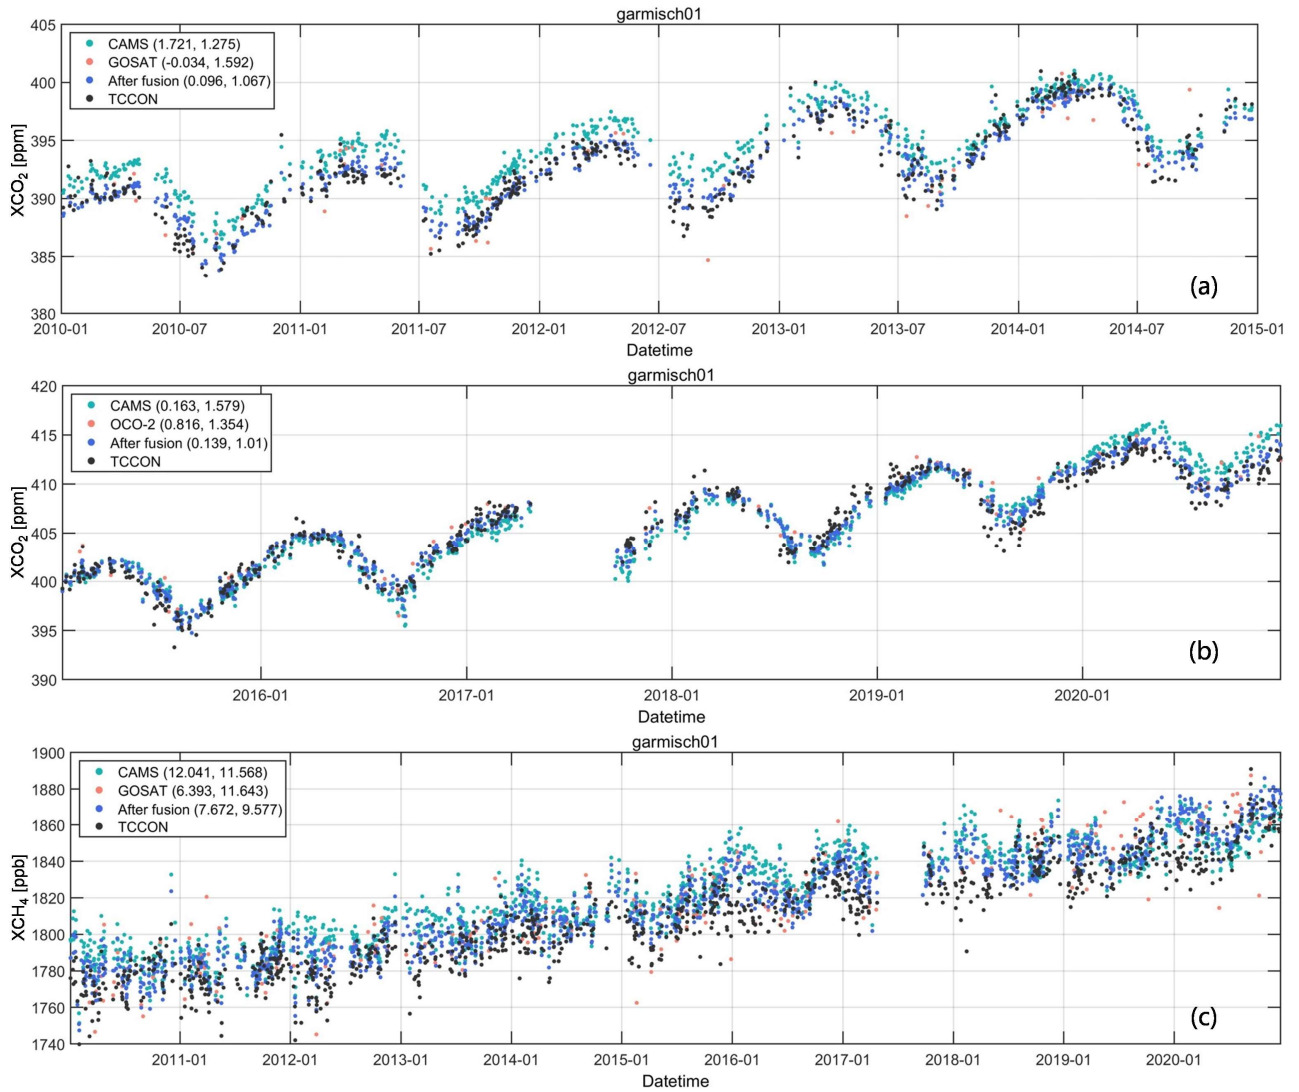

**Figure 6.** Scatter-plots of the time series for daily CAMS-EGG4, GOSAT, OCO-2, fused, and TCCON data on garmisch01. The first and second numbers in the bracket represent  $\mu$  and  $\sigma$ , respectively. Unit: ppm/ppb to XCO<sub>2</sub>/XCH<sub>4</sub> for  $\mu$  and  $\sigma$ .

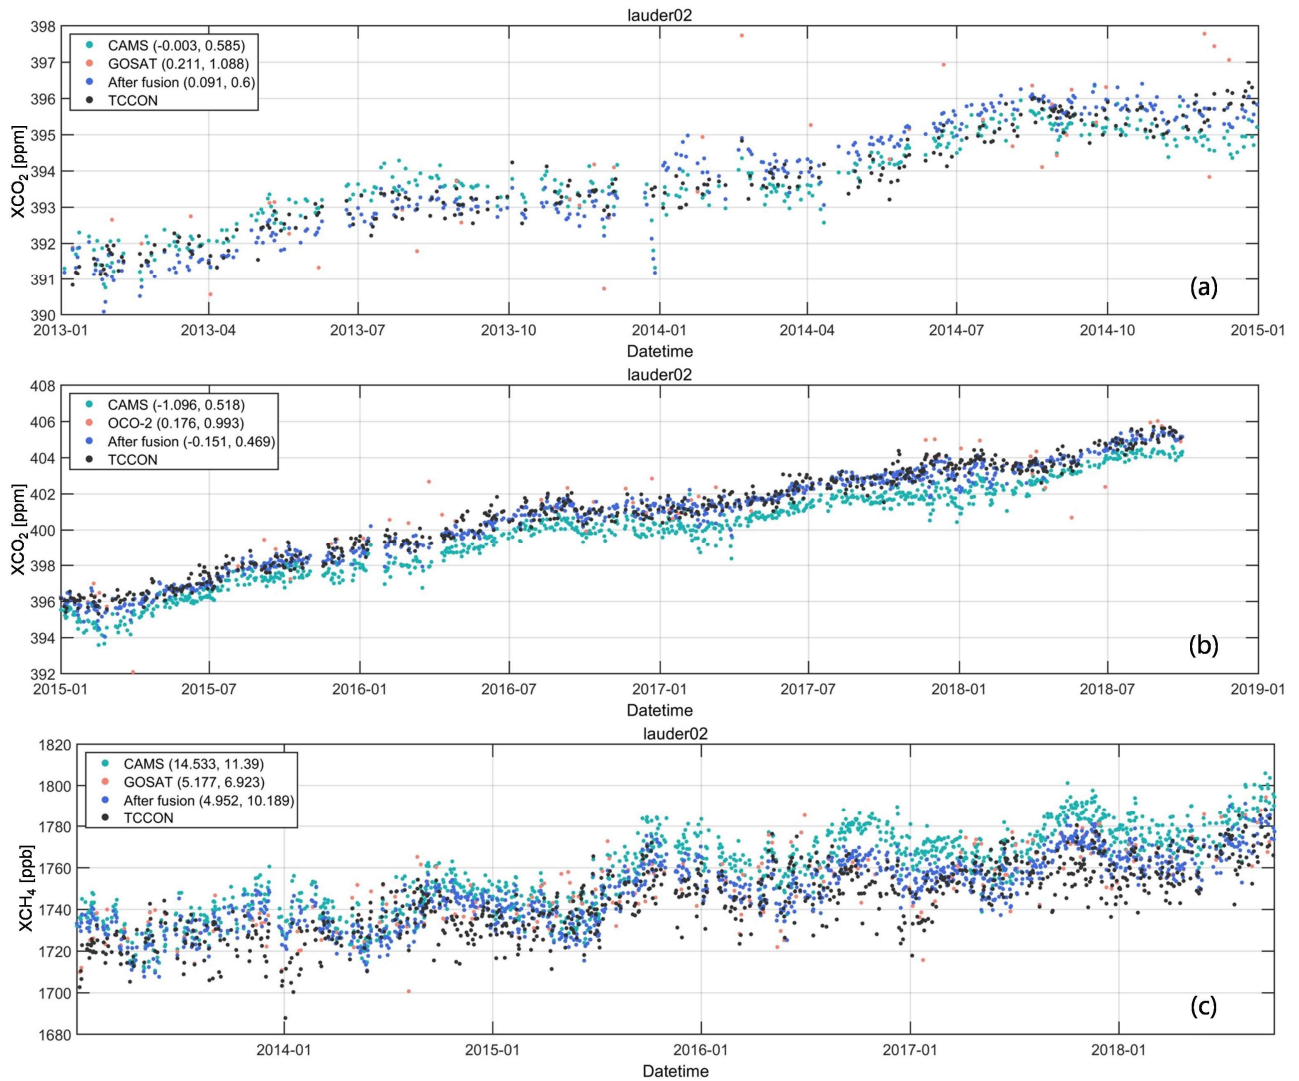

**Figure 7.** Scatter-plots of the time series for daily CAMS-EGG4, GOSAT, OCO-2, fused, and TCCON data on lauder02. The first and second numbers in the bracket represent  $\mu$  and  $\sigma$ , respectively. Unit: ppm/ppb to XCO<sub>2</sub>/XCH<sub>4</sub> for  $\mu$  and  $\sigma$ .

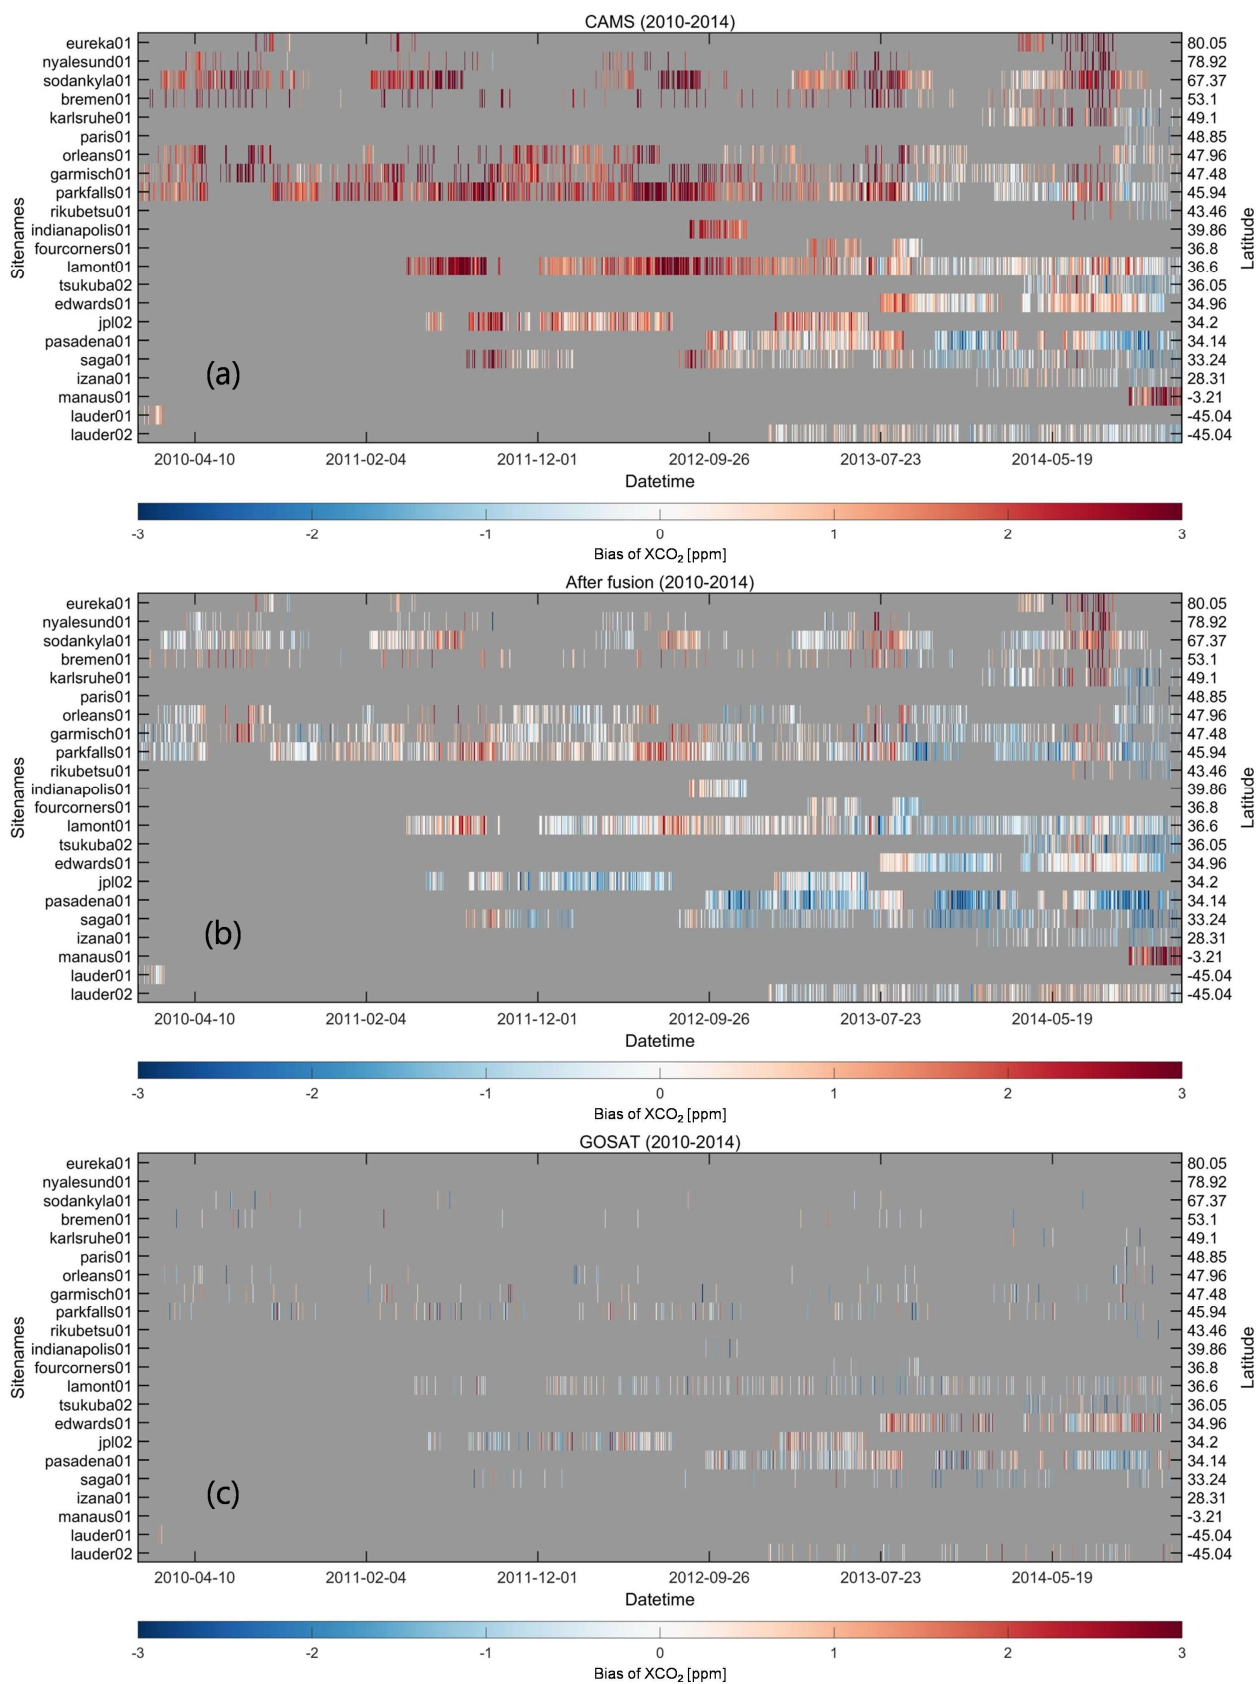

**Figure 8.** Heat maps of the biases between daily (a) CAMS-EGG4/(b) fused/(c) GOSAT and TCCON XCO<sub>2</sub> over time and latitude. Color ramps stand for the biases of XCO<sub>2</sub>. Background colors (grey) indicate the missing data.

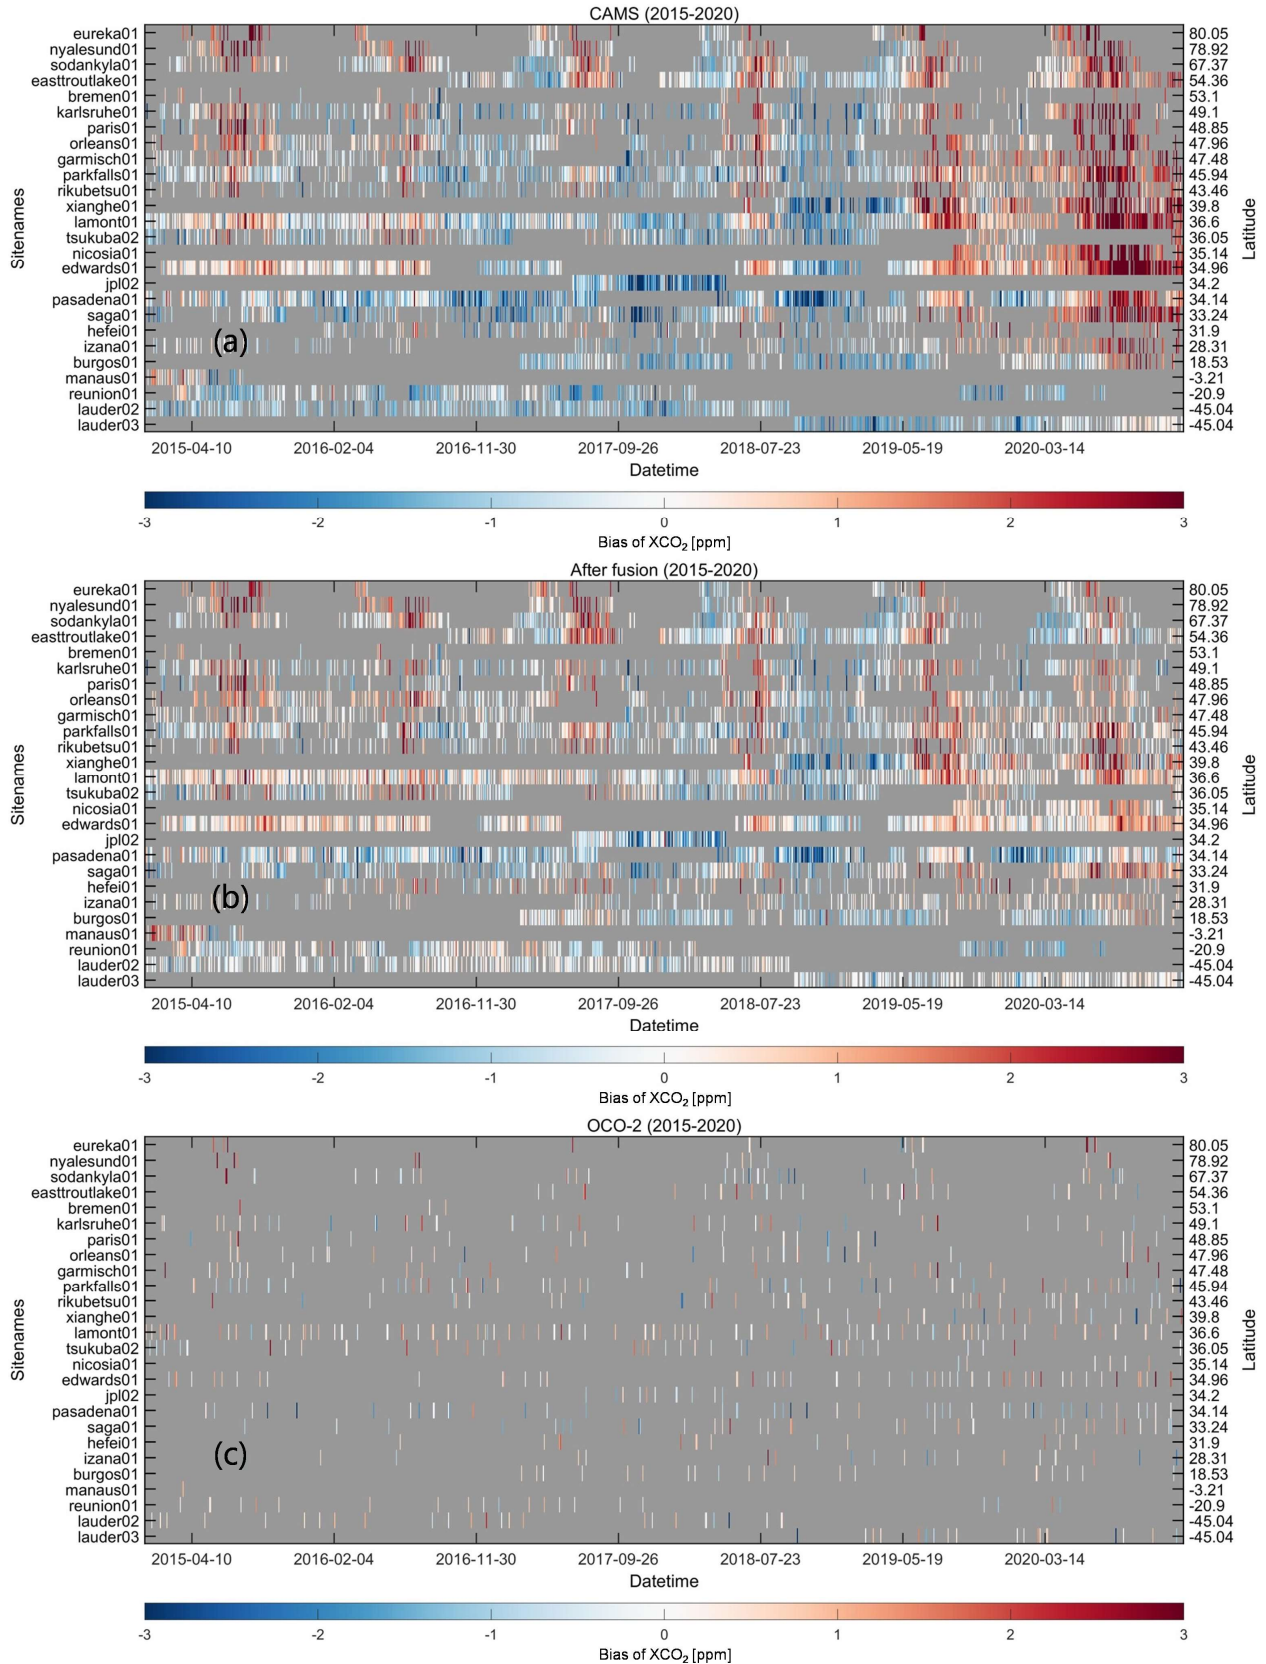

**Figure 9.** Heat maps of the biases between daily (a) CAMS-EGG4/(b) fused/(c) OCO-2 and TCCON XCO<sub>2</sub> over time and latitude. Color ramps stand for the biases of XCO<sub>2</sub>. Background colors (grey) indicate the missing data.



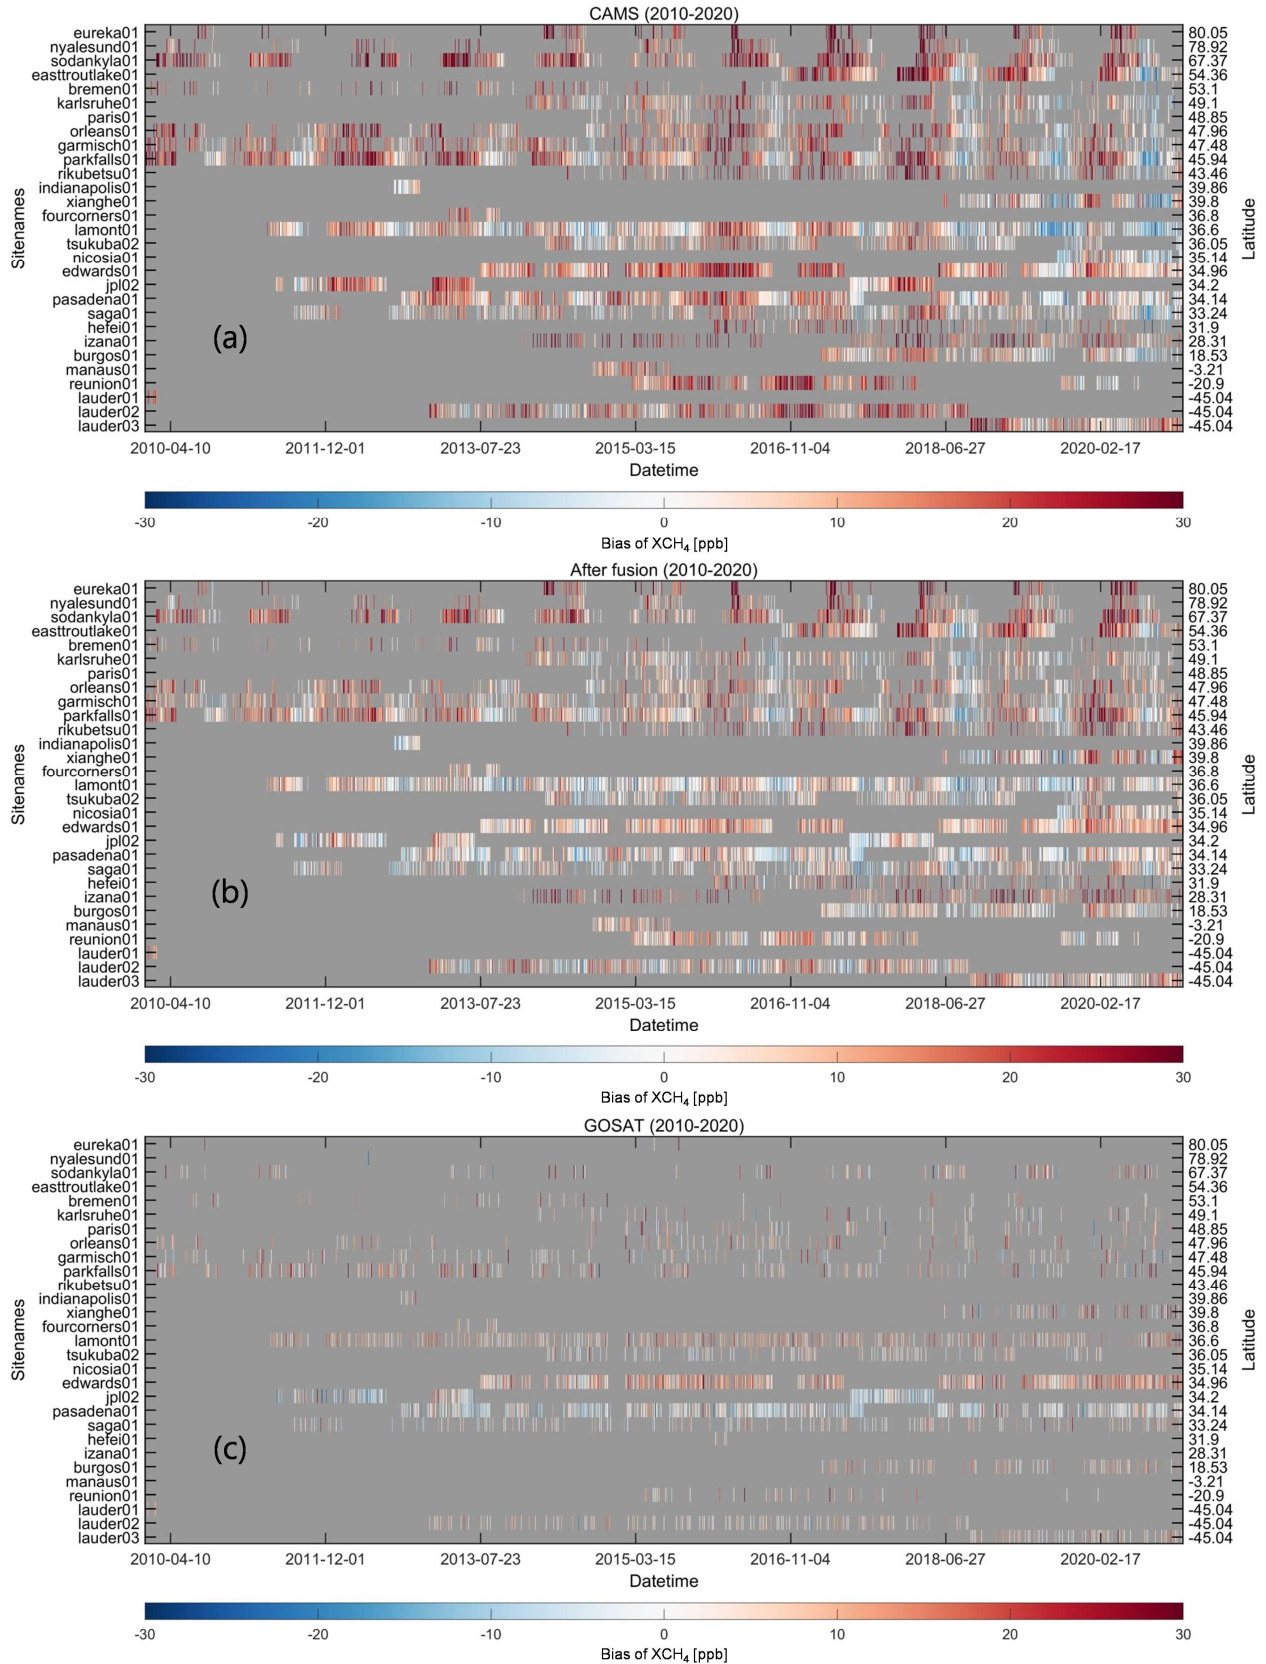

**Figure 10.** Heat maps of the biases between daily (a) CAMS-EGG4/(b) fused/(c) GOSAT and TCCON XCH<sub>4</sub> over time and latitude. Color ramps stand for the biases of XCO<sub>2</sub>. Background colors (grey) indicate the missing data.

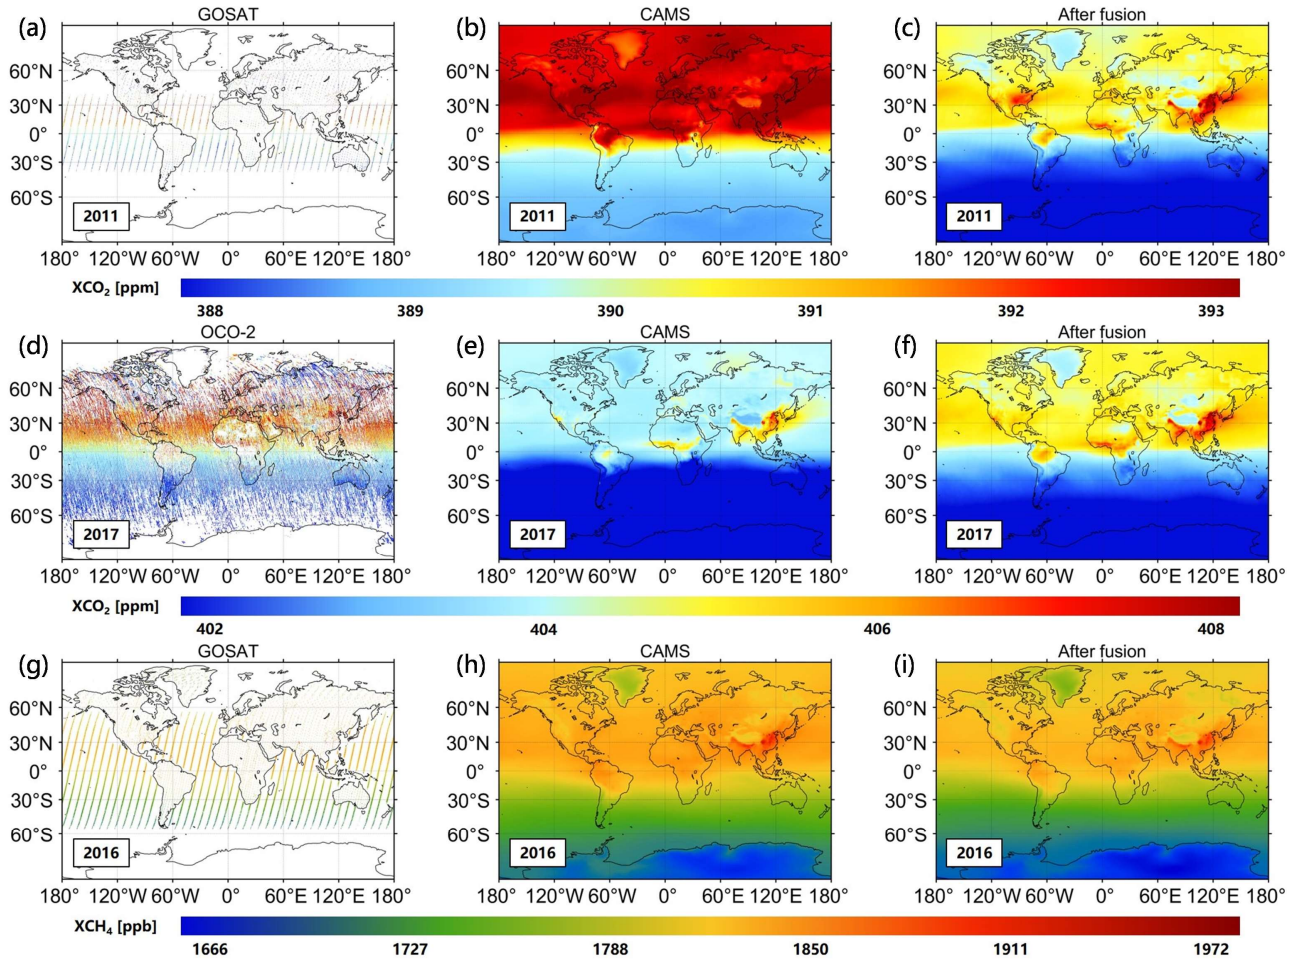

**Figure 11.** Annual (a and g) GOSAT, (d) OCO-2, (b, e, and h) CAMS-EGG4, and (c, f, and i) fused  $XCO_2/XCH_4$  over the globe. Color ramps stand for the values of  $XCO_2$  and  $XCH_4$ .

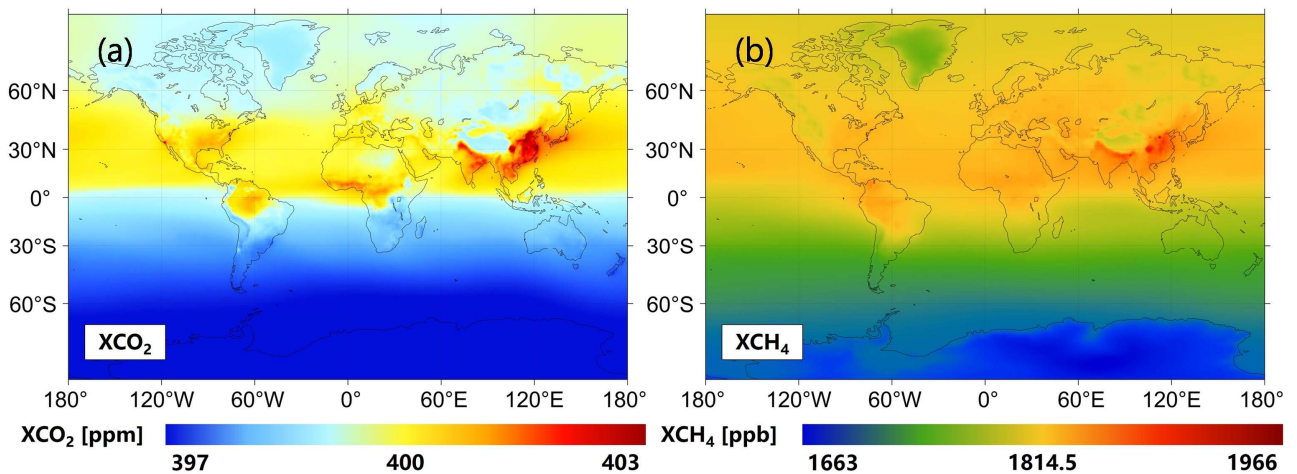

**Figure 14.** Multi-year mean fused (a)  $XCO_2$  and (b)  $XCH_4$  from 2010 to 2020 over the globe. Color ramps stand for the values of  $XCO_2$  and  $XCH_4$ .

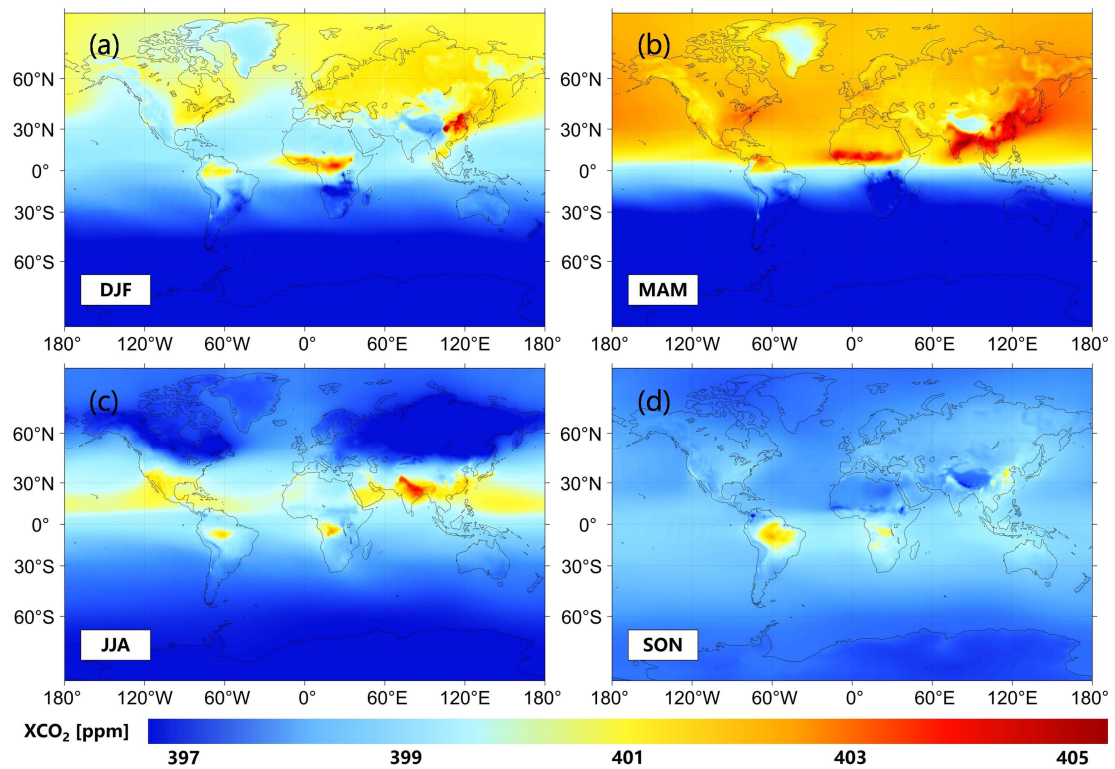

**Figure 15.** Seasonal fused XCO<sub>2</sub> from 2010 to 2020 over the globe. The color ramp stands for the value of XCO<sub>2</sub>. (a) DJF, (b) MAM, (c) JJA, and (d) SON denote Dec. to Feb., Mar. to May., Jun. to Aug., and Sep. to Nov., respectively.

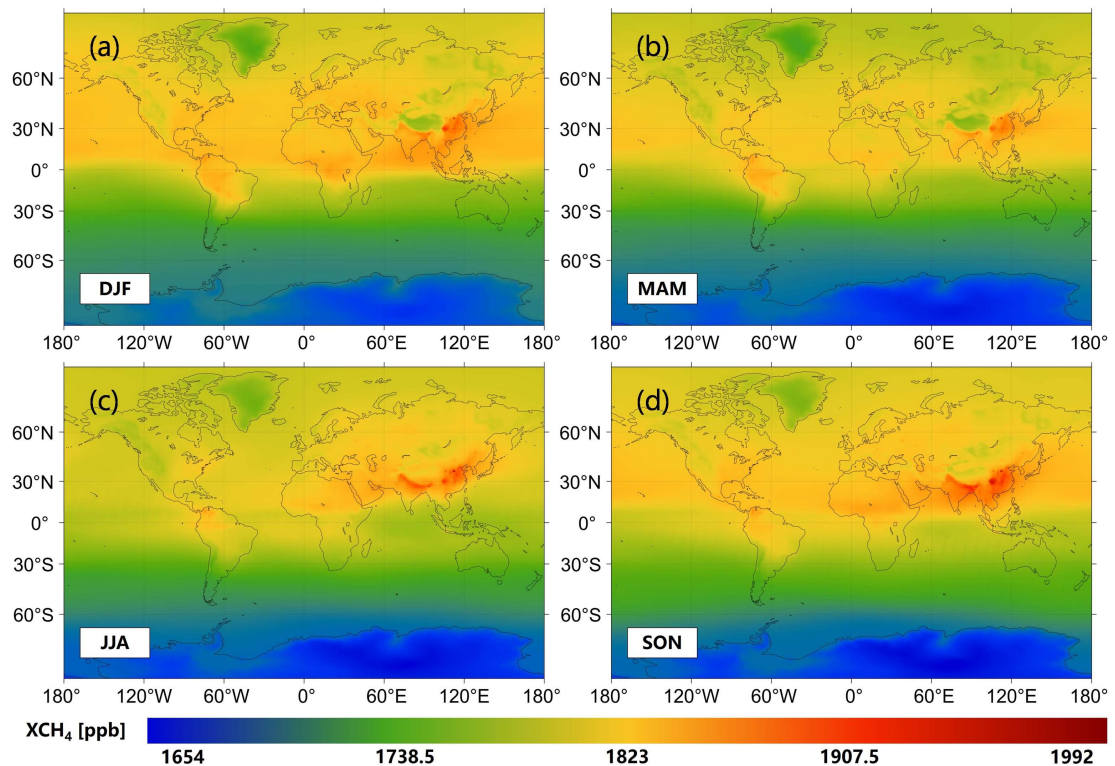

**Figure 16.** Seasonal fused XCH<sub>4</sub> from 2010 to 2020 over the globe. The color ramp stands for the value of XCH<sub>4</sub>. (a) DJF, (b) MAM, (c) JJA, and (d) SON denote Dec. to Feb., Mar. to May., Jun. to Aug., and Sep. to Nov., respectively.

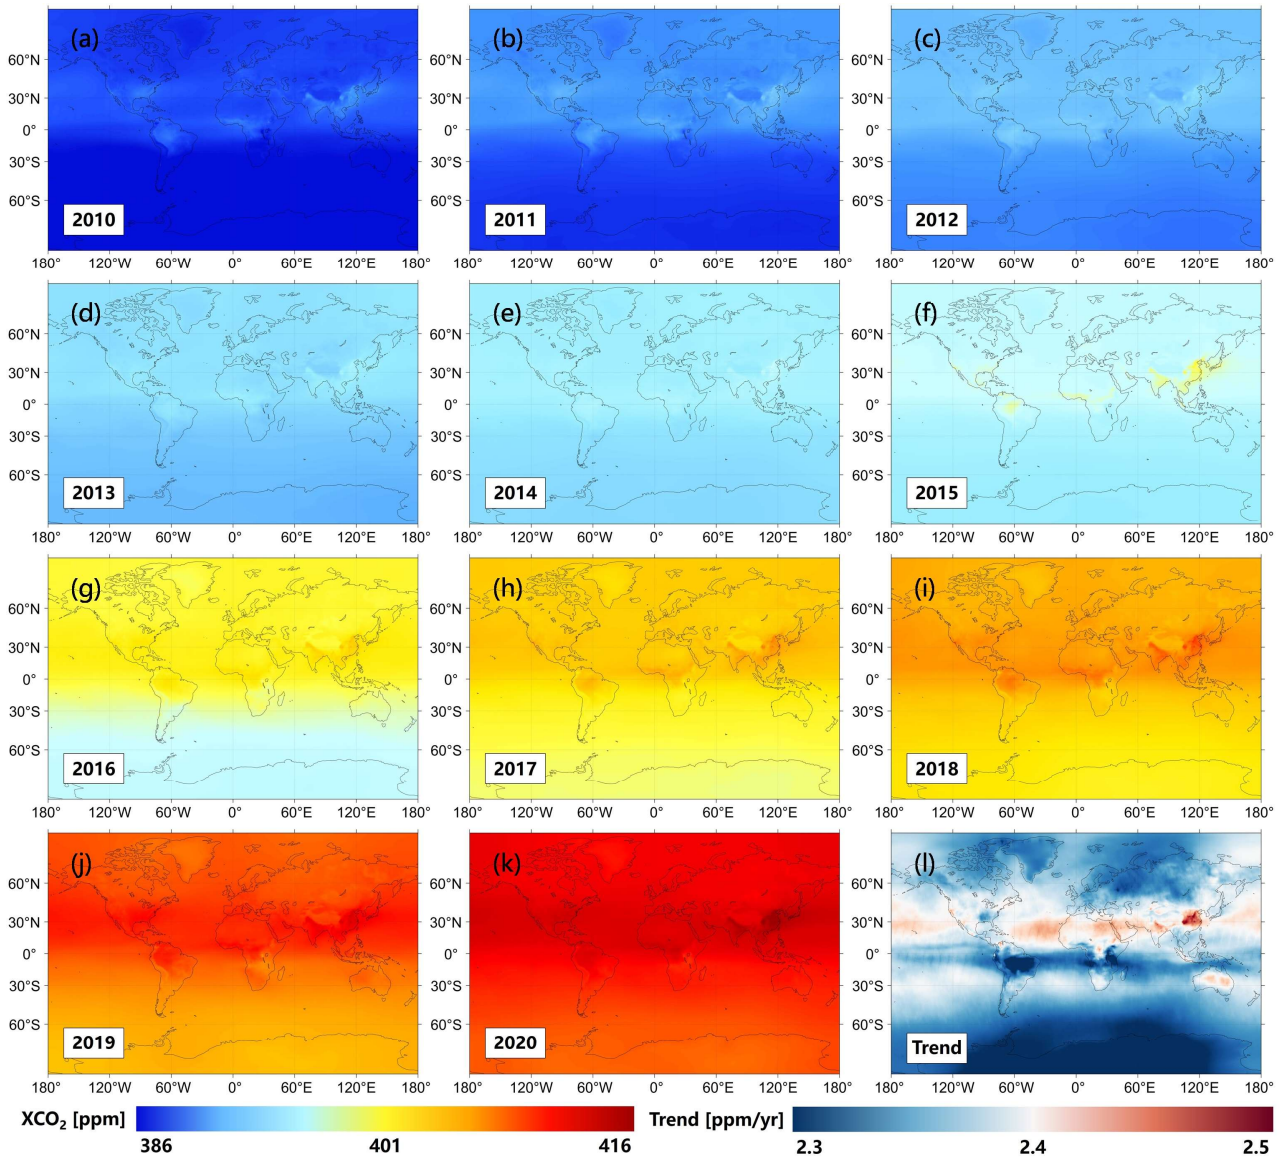

**Figure 17.** Annual fused (a-k) XCO<sub>2</sub> and (l) its trend from 2010 to 2020 over the globe. Color ramps stand for the values of XCO<sub>2</sub> and its trend. ppm/yr: ppm per year.

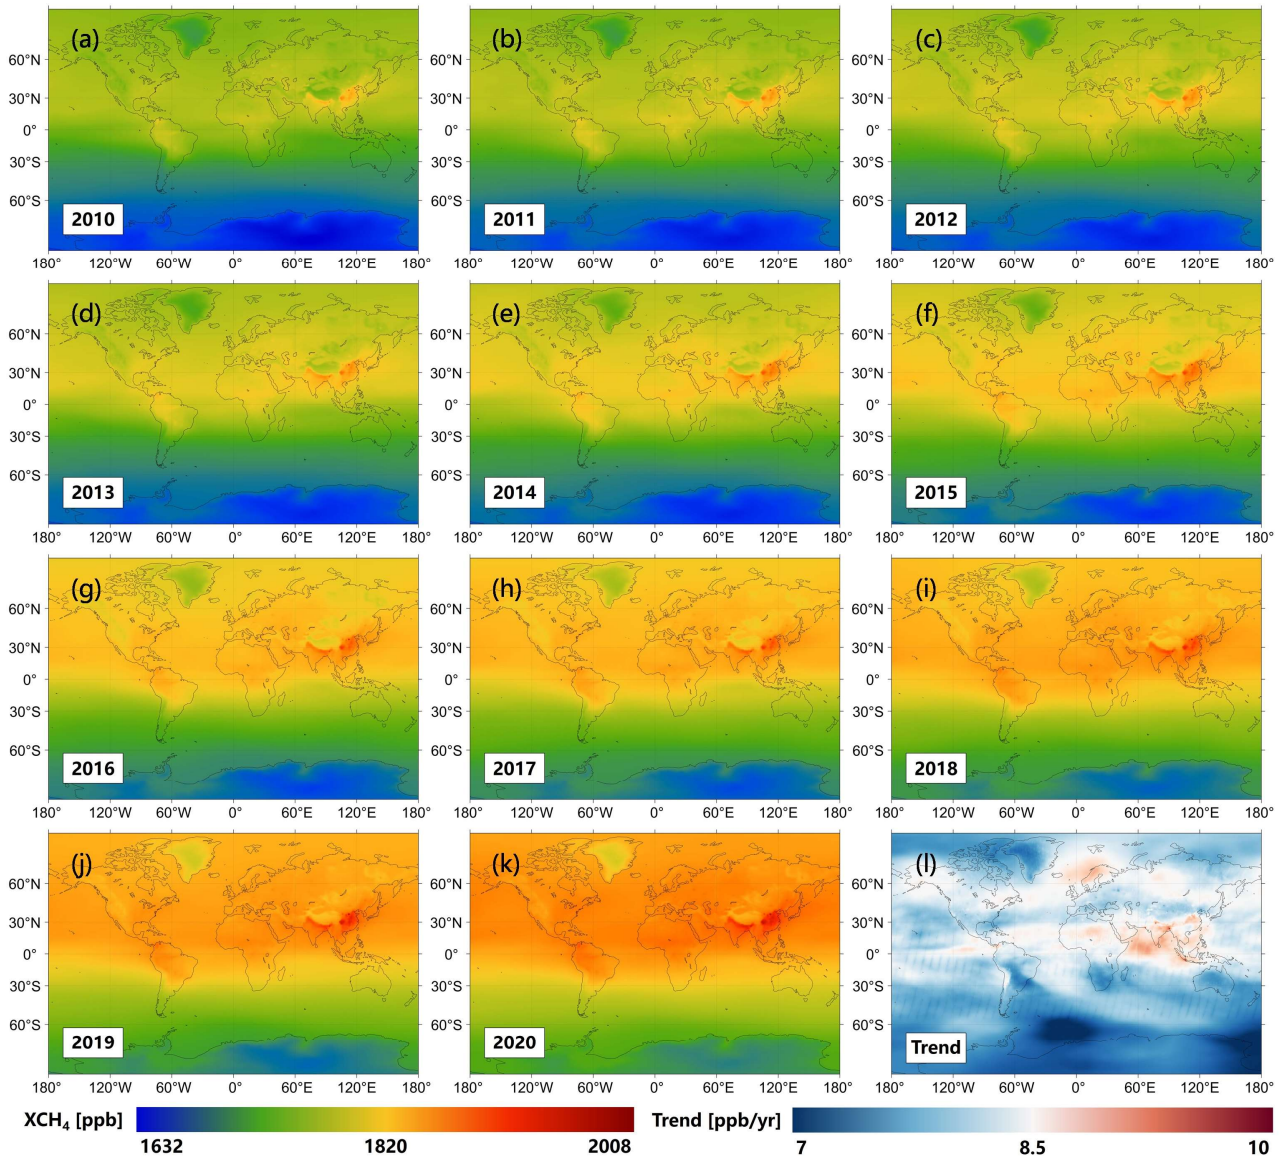

**Figure 18.** Annual fused (a-k) XCH<sub>4</sub> and (l) its trend from 2010 to 2020 over the globe. Color ramps stand for the values of XCH<sub>4</sub> and its trend. ppb/yr: ppb per year.

**Q1.11: Text: Figure and Fig. need to be unified.**

**Response:** Thank the referee for his/her comment. In our study, the text formats of figures (i.e., “Figure” and “Fig.”) followed the submission instructions of ESSD (<https://www.earth-sytem-science-data.net/submission.html#figurestables>):

- The abbreviation "Fig." should be used when it appears in running text and should be followed by a number unless it comes at the beginning of a sentence, e.g.: "The results are depicted in Fig. 5. Figure 9 reveals that...".

## **Q1.12: References: Modify the subscript of all references.**

**Response:** Thank the referee for his/her comment. The subscript of all references has been modified.

### **The main revision is as follows:**

Bergamaschi, P., Houweling, S., Segers, A., Krol, M., Frankenberg, C., Scheepmaker, R. A., Dlugokencky, E., Wofsy, S. C., Kort, E. A., Sweeney, C., Schuck, T., Brenninkmeijer, C., Chen, H., Beck, V., and Gerbig, C.: Atmospheric CH<sub>4</sub> in the first decade of the 21st century: Inverse modeling analysis using SCIAMACHY satellite retrievals and NOAA surface measurements, *Journal of Geophysical Research: Atmospheres*, 118, 7350–7369, <https://doi.org/10.1002/jgrd.50480>, 2013.

Buchwitz, M., Reuter, M., Schneising, O., Boesch, H., Guerlet, S., Dils, B., Aben, I., Armante, R., Bergamaschi, P., Blumenstock, T., Bovensmann, H., Brunner, D., Buchmann, B., Burrows, J. P., Butz, A., Chédin, A., Chevallier, F., Crevoisier, C. D., Deutscher, N. M., Frankenberg, C., Hase, F., Hasekamp, O. P., Heymann, J., Kaminski, T., Laeng, A., Lichtenberg, G., De Mazière, M., Noël, S., Notholt, J., Orphal, J., Popp, C., Parker, R., Scholze, M., Susmann, R., Stiller, G. P., Warneke, T., Zehner, C., Bril, A., Crisp, D., Griffith, D. W. T., Kuze, A., O'Dell, C., Oshchepkov, S., Sherlock, V., Suto, H., Wennberg, P., Wunch, D., Yokota, T., and Yoshida, Y.: The Greenhouse Gas Climate Change Initiative (GHG-CCI): Comparison and quality assessment of near-surface-sensitive satellite-derived CO<sub>2</sub> and CH<sub>4</sub> global data sets, *Remote Sensing of Environment*, 162, 344–362, <https://doi.org/10.1016/j.rse.2013.04.024>, 2015.

Chen, H., Xu, X., Fang, C., Li, B., and Nie, M.: Differences in the temperature dependence of wetland CO<sub>2</sub> and CH<sub>4</sub> emissions vary with water table depth, *Nat. Clim. Chang.*, 11, 766–771, <https://doi.org/10.1038/s41558-021-01108-4>, 2021.

Hakkarainen, J., Jalongo, I., and Tamminen, J.: Direct space-based observations of anthropogenic CO<sub>2</sub> emission areas from OCO-2, *Geophysical Research Letters*, 43, 11,400–11,406, <https://doi.org/10.1002/2016GL070885>, 2016.

He, C., Ji, M., Grieneisen, M. L., and Zhan, Y.: A review of datasets and methods for deriving spatiotemporal distributions of atmospheric CO<sub>2</sub>, *Journal of Environmental Management*, 322, 116101, <https://doi.org/10.1016/j.jenvman.2022.116101>, 2022a.

He, C., Ji, M., Li, T., Liu, X., Tang, D., Zhang, S., Luo, Y., Grieneisen, M. L., Zhou, Z., and Zhan, Y.: Deriving Full-Coverage and Fine-Scale XCO<sub>2</sub> Across China Based on OCO-2 Satellite Retrievals and CarbonTracker Output, *Geophysical Research Letters*, 49, e2022GL098435, <https://doi.org/10.1029/2022GL098435>, 2022b.

He, Z., Lei, L., Zhang, Y., Sheng, M., Wu, C., Li, L., Zeng, Z.-C., and Welp, L. R.: Spatio-Temporal Mapping of Multi-Satellite Observed Column Atmospheric CO<sub>2</sub> Using Precision-Weighted Kriging Method, *Remote Sensing*, 12, 576, <https://doi.org/10.3390/rs12030576>, 2020.

Hotchkiss, E. R., Hall Jr, R. O., Sponseller, R. A., Butman, D., Klaminder, J., Laudon, H., Rosvall, M., and Karlsson, J.: Sources of and processes controlling CO<sub>2</sub> emissions change with the size of streams and rivers, *Nature Geosci*, 8, 696–699, <https://doi.org/10.1038/ngeo2507>, 2015.

Houweling, S., Baker, D., Basu, S., Boesch, H., Butz, A., Chevallier, F., Deng, F., Dlugokencky, E. J., Feng, L.,

- Ganshin, A., Hasekamp, O., Jones, D., Maksyutov, S., Marshall, J., Oda, T., O'Dell, C. W., Oshchepkov, S., Palmer, P. I., Peylin, P., Poussi, Z., Reum, F., Takagi, H., Yoshida, Y., and Zhuravlev, R.: An intercomparison of inverse models for estimating sources and sinks of CO<sub>2</sub> using GOSAT measurements, *Journal of Geophysical Research: Atmospheres*, 120, 5253–5266, <https://doi.org/10.1002/2014JD022962>, 2015.
- Katzfuss, M. and Cressie, N.: Tutorial on fixed rank kriging (FRK) of CO<sub>2</sub> data, Department of Statistics, The Ohio State University, Columbus, 2011.
- Kenea, S. T., Lee, H., Patra, P. K., Li, S., Labzovskii, L. D., and Joo, S.: Long-term changes in CH<sub>4</sub> emissions: Comparing  $\Delta\text{CH}_4/\Delta\text{CO}_2$  ratios between observation and proved model in East Asia (2010–2020), *Atmospheric Environment*, 293, 119437, <https://doi.org/10.1016/j.atmosenv.2022.119437>, 2023.
- Le Quéré, C., Korsbakken, J. I., Wilson, C., Tosun, J., Andrew, R., Andres, R. J., Canadell, J. G., Jordan, A., Peters, G. P., and van Vuuren, D. P.: Drivers of declining CO<sub>2</sub> emissions in 18 developed economies, *Nat. Clim. Chang.*, 9, 213–217, <https://doi.org/10.1038/s41558-019-0419-7>, 2019.
- Li, L., Lei, L., Song, H., Zeng, Z., and He, Z.: Spatiotemporal Geostatistical Analysis and Global Mapping of CH<sub>4</sub> Columns from GOSAT Observations, *Remote Sensing*, 14, 654, <https://doi.org/10.3390/rs14030654>, 2022.
- Liu, J., Fung, I., Kalnay, E., and Kang, J.-S.: CO<sub>2</sub> transport uncertainties from the uncertainties in meteorological fields, *Geophysical Research Letters*, 38, <https://doi.org/10.1029/2011GL047213>, 2011.
- Liu, L. and Greaver, T. L.: A review of nitrogen enrichment effects on three biogenic GHGs: the CO<sub>2</sub> sink may be largely offset by stimulated N<sub>2</sub>O and CH<sub>4</sub> emission, *Ecology Letters*, 12, 1103–1117, <https://doi.org/10.1111/j.1461-0248.2009.01351.x>, 2009.
- Liu, Z., Liu, Z., Song, T., Gao, W., Wang, Y., Wang, L., Hu, B., Xin, J., and Wang, Y.: Long-term variation in CO<sub>2</sub> emissions with implications for the interannual trend in PM<sub>2.5</sub> over the last decade in Beijing, China, *Environmental Pollution*, 266, 115014, <https://doi.org/10.1016/j.envpol.2020.115014>, 2020.
- Montzka, S. A., Dlugokencky, E. J., and Butler, J. H.: Non-CO<sub>2</sub> greenhouse gases and climate change, *Nature*, 476, 43–50, <https://doi.org/10.1038/nature10322>, 2011.
- Siabi, Z., Falahatkar, S., and Alavi, S. J.: Spatial distribution of XCO<sub>2</sub> using OCO-2 data in growing seasons, *Journal of Environmental Management*, 244, 110–118, <https://doi.org/10.1016/j.jenvman.2019.05.049>, 2019.
- Wang, Y., Yuan, Q., Li, T., Zhu, L., and Zhang, L.: Estimating daily full-coverage near surface O<sub>3</sub>, CO, and NO<sub>2</sub> concentrations at a high spatial resolution over China based on S5P-TROPOMI and GEOS-FP, *ISPRS Journal of Photogrammetry and Remote Sensing*, 175, 311–325, 2021a.
- Wang, Y., Yuan, Q., Li, T., and Zhang, L.: Global long-term (2010-2020) daily seamless fused XCO<sub>2</sub> and XCH<sub>4</sub> from CAMS, OCO-2, and GOSAT, <https://doi.org/10.5281/zenodo.7388893>, 2022b.
- Yoro, K. O. and Daramola, M. O.: Chapter 1 - CO<sub>2</sub> emission sources, greenhouse gases, and the global warming effect, in: *Advances in Carbon Capture*, edited by: Rahimpour, M. R., Farsi, M., and Makarem, M. A., Woodhead Publishing, 3–28, <https://doi.org/10.1016/B978-0-12-819657-1.00001-3>, 2020.

Zhang, L., Li, T., and Wu, J.: Deriving gapless CO<sub>2</sub> concentrations using a geographically weighted neural network: China, 2014–2020, *International Journal of Applied Earth Observation and Geoinformation*, 114, 103063, <https://doi.org/10.1016/j.jag.2022.103063>, 2022.

Zhang, M. and Liu, G.: Mapping contiguous XCO<sub>2</sub> by machine learning and analyzing the spatio-temporal variation in China from 2003 to 2019, *Science of The Total Environment*, 858, 159588, <https://doi.org/10.1016/j.scitotenv.2022.159588>, 2023.

**Q1.13: L529: 108&thinsp;000 European cities.**

**Response:** Thank the referee for his/her comment. The unreadable text of this reference has been revised in the manuscript.

**The main revision is as follows:**

Moran, D., Pichler, P.-P., Zheng, H., Muri, H., Klenner, J., Kramel, D., Többen, J., Weisz, H., Wiedmann, T., Wyckmans, A., Strømman, A. H., and Gurney, K. R.: Estimating CO<sub>2</sub> emissions for 10000 European cities, *Earth System Science Data*, 14, 845–864, <https://doi.org/10.5194/essd-14-845-2022>, 2022.

Last but not least, we gratefully thank the referee again for his/her significant comments and suggestions, which have greatly helped us to improve the technical quality and presentation of our manuscript.
